# Supplementary material for: Lipoprotein(a) and Small Dense LDL Profiles and Statin Response in Type 2 Diabetes Mellitus: A Case-Control Study
Source: Research Square preprint supplement (doi:10.21203/rs.3.rs-7577991/v1), 2025-09-30
Supplement: Supplementary file 1 [file 11522d155f3bc70fb52125b0.docx]

**Supplementary Fig. 1.** The correlation between HOMA-IR and HbA1c.

The x-axis represents HOMA-IR (homeostatic model assessment of insulin resistance), an index of insulin resistance, with higher values indicating greater insulin resistance. The y-axis represents HbA1c (%), which reflects the average blood glucose concentration over the preceding 2–3 months, with higher values indicating poorer glycemic control. Each point on the plot denotes an individual subject, illustrating the relationship between HOMA-IR and HbA1c. HbA1c, hemoglobin A1C; HOMA-IR, homeostatic model assessment for insulin resistance.

**Supplementary Fig. 2.** Distribution of Lp(a) levels across participant groups.

Bar graph shows the percentage of participants with Lp(a) levels in three categories: low (<75 nmol/L, teal blue), intermediate (75–125 nmol/L, gray), and high (>125 nmol/L, black), across control, T2DM, and, CVD group with or without lipid-lowering therapy. Each bar represents the proportion of individuals within each Lp(a) category for the respective group. T2DM, type 2 diabetes mellitus; CVD, cardiovascular disease

**Supplementary Fig. 3.** Correlation between Lp(a) and LDL and LDL particle subclasses.

1. LDL-cholesterol (mg/dL), (**b**) LDL particle number (nmol/L), (**c**) LDL-5 particle number (nmol/L), and (**d**) LDL-6 particle number (nmol/L). Each dot represents an individual participant. Solid lines represent the regression fit, and dotted lines indicate the 95% confidence intervals (CI). *P* indicate significant differences. Lp(a), lipoprotein(a); LDL, low-density lipoprotein; CI, confidence interval

**Supplementary Fig. 4.** Correlation between Lp(a) and LDL and LDL particle subclasses by group.

**(a)** Correlation between Lp(a) concentration (nmol/L) and LDL-cholesterol (mg/dL), LDL-5 particle number (nmol/L), and LDL-6 particle number (nmol/L) in control group.

**(b)** Correlation between Lp(a) concentration (nmol/L) and LDL-cholesterol (mg/dL), LDL-5 particle number (nmol/L), and LDL-6 particle number (nmol/L) in T2DM (not received lipid-lowering drugs).

Each dot represents an individual participant. Solid lines represent the regression fit, and dotted lines indicate the 95% confidence intervals (CI). Lp(a), lipoprotein(a); LDL, low-density lipoprotein; CI, confidence interval.
*p* indicates significant differences.

**Supplementary Fig. 5.** Heat map of Spearman’s rank correlation analysis between circulating lipoprotein levels and lipoprotein particle subclasses.

Correlation coefficients (r) were calculated to evaluate the relationships between lipoprotein levels and the concentrations of specific lipoprotein particle subclasses. The heat map displays a gradient from negative correlations (brick red squares), to insignificant (white squares), to positive correlations (brick green squares). Lp(a), lipoprotein (a); VLDL, very-low-density lipoprotein; IDL, intermediate-density lipoprotein; LDL, low-density lipoprotein; HDL, high-density lipoprotein. Positive r values indicate direct correlations, whereas negative r values indicate inverse correlations. *: *p*<0.05; **: *p*<0.01; ***: *p*<0.001; ****: *p*<0.0001 indicate significant differences.
