# Supplementary material for: Lipoprotein(a) and Small Dense LDL Profiles and Statin Response in Type 2 Diabetes Mellitus: A Case-Control Study
Source: Research Square preprint supplement (doi:10.21203/rs.3.rs-7577991/v1), 2025-09-30
Supplement: Supplementary file 2 [file 9776fcd308ad78870cab4431.docx]

| **Supplementary Table 1** Lipoprotein variables measured by 1H NMR | | | | | |
| --- | --- | --- | --- | --- | --- |
| **Number** | **Lipoprotein variables** | **Matrix** | **Measured analyte** | **Unit** | **Full Name** |
| 1 | TPTG | Total Plasma | Triglycerides | mg/dL | Triglyceride |
| 2 | TPCH | Total Plasma | Cholesterol | mg/dL | Cholesterol |
| 3 | LDCH | LDL | Cholesterol | mg/dL | LDL-Cholesterol |
| 4 | HDCH | HDL | Cholesterol | mg/dL | HDL-Cholesterol |
| 5 | TPA1 | Total Plasma | Apolipoprotein A1 | mg/dL | Apo-A1 |
| 6 | TPA2 | Total Plasma | Apolipoprotein A2 | mg/dL | Apo-A2 |
| 7 | TPAB | Total Plasma | Apolipoprotein B100 | mg/dL | Apo-B100 |
| 8 | LDHD | Ratio LDL and HDL Cholesterol | LDL Cholesterol / HDL Cholesterol | -/- | LDL-Chol/HDL-Chol |
| 9 | ABA1 | Ratio of Apolipoproteins A1 and B100 | Apolipoprotein A1/ Apolipoprotein B100 | -/- | Apo-B100/Apo-A1 |
| 10 | TBPN | Apolipoprotein-B100 carrying particles | Particle Number | nmol/L | Total Particle Number |
| 11 | VLPN | VLDL | Particle Number | nmol/L | VLDL Particle Number |
| 12 | IDPN | IDL | Particle Number | nmol/L | IDL Particle Number |
| 13 | LDPN | LDL | Particle Number | nmol/L | LDL Particle Number |
| 14 | L1PN | LDL-1 | Particle Number | nmol/L | LDL-1 Particle Number |
| 15 | L2PN | LDL-2 | Particle Number | nmol/L | LDL-2 Particle Number |
| 16 | L3PN | LDL-3 | Particle Number | nmol/L | LDL-3 Particle Number |
| 17 | L4PN | LDL-4 | Particle Number | nmol/L | LDL-4 Particle Number |
| 18 | L5PN | LDL-5 | Particle Number | nmol/L | LDL-5 Particle Number |
| 19 | L6PN | LDL-6 | Particle Number | nmol/L | LDL-6 Particle Number |
| 20 | VLTG | VLDL Class | Triglycerides | mg/dL | VLDL-Triglyceride |
| 21 | IDTG | IDL Class | Triglycerides | mg/dL | IDL-Triglyceride |
| 22 | LDTG | LDL Class | Triglycerides | mg/dL | LDL-Triglyceride |
| 23 | HDTG | HDL Class | Triglycerides | mg/dL | HDL-Triglyceride |
| 24 | VLCH | VLDL Class | Cholesterol | mg/dL | VLDL-Cholesterol |
| 25 | IDCH | IDL Class | Cholesterol | mg/dL | IDL-Cholesterol |
| 26 | VLFC | VLDL Class | Free Cholesterol | mg/dL | VLDL-Free Cholesterol |
| 27 | IDFC | IDL Class | Free Cholesterol | mg/dL | IDL-Free Cholesterol |
| 28 | LDFC | LDL Class | Free Cholesterol | mg/dL | LDL-Free Cholesterol |
| 29 | HDFC | HDL Class | Free Cholesterol | mg/dL | HDL-Free Cholesterol |
| 30 | VLPL | VLDL Class | Phospholipids | mg/dL | VLDL-Phospholipids |
| 31 | IDPL | IDL Class | Phospholipids | mg/dL | IDL-Phospholipids |
| 32 | LDPL | LDL Class | Phospholipids | mg/dL | LDL-Phospholipids |
| 33 | HDPL | HDL Class | Phospholipids | mg/dL | HDL-Phospholipids |
| 34 | HDA1 | HDL Class | Apolipoprotein A1 | mg/dL | HDL- Apo A1 |
| 35 | HDA2 | HDL Class | Apolipoprotein A2 | mg/dL | HDL- Apo A2 |
| 36 | VLAB | VLDL Class | Apolipoprotein B100 | mg/dL | VLDL- Apo B100 |
| 37 | IDAB | IDL Class | Apolipoprotein B100 | mg/dL | IDL- Apo B100 |
| 38 | LDAB | LDL Class | Apolipoprotein B100 | mg/dL | LDL- Apo B100 |
| 39 | V1TG | VLDL-1 Subclass | Triglycerides | mg/dL | VLDL-1-Triglyceride |
| 40 | V2TG | VLDL-2 Subclass | Triglycerides | mg/dL | VLDL-2-Triglyceride |
| 41 | V3TG | VLDL-3 Subclass | Triglycerides | mg/dL | VLDL-3-Triglyceride |
| 42 | V4TG | VLDL-4 Subclass | Triglycerides | mg/dL | VLDL-4-Triglyceride |
| 43 | V5TG | VLDL-5 Subclass | Triglycerides | mg/dL | VLDL-5-Triglyceride |
| 44 | V1CH | VLDL-1 Subclass | Cholesterol | mg/dL | VLDL-1-Cholesterol |
| 45 | V2CH | VLDL-2 Subclass | Cholesterol | mg/dL | VLDL-2-Cholesterol |
| 46 | V3CH | VLDL-3 Subclass | Cholesterol | mg/dL | VLDL-3-Cholesterol |
| 47 | V4CH | VLDL-4 Subclass | Cholesterol | mg/dL | VLDL-4-Cholesterol |
| 48 | V5CH | VLDL-5 Subclass | Cholesterol | mg/dL | VLDL-5-Cholesterol |
| 49 | V1FC | VLDL-1 Subclass | Free Cholesterol | mg/dL | VLDL-1-Free Cholesterol |
| 50 | V2FC | VLDL-2 Subclass | Free Cholesterol | mg/dL | VLDL-2-Free Cholesterol |
| 51 | V3FC | VLDL-3 Subclass | Free Cholesterol | mg/dL | VLDL-3-Free Cholesterol |
| 52 | V4FC | VLDL-4 Subclass | Free Cholesterol | mg/dL | VLDL-4-Free Cholesterol |
| 53 | V5FC | VLDL-5 Subclass | Free Cholesterol | mg/dL | VLDL-5-Free Cholesterol |
| 54 | V1PL | VLDL-1 Subclass | Phospholipids | mg/dL | VLDL-1-Phospholipids |
| 55 | V2PL | VLDL-2 Subclass | Phospholipids | mg/dL | VLDL-2-Phospholipids |
| 56 | V3PL | VLDL-3 Subclass | Phospholipids | mg/dL | VLDL-3-Phospholipids |
| 57 | V4PL | VLDL-4 Subclass | Phospholipids | mg/dL | VLDL-4-Phospholipids |
| 58 | V5PL | VLDL-5 Subclass | Phospholipids | mg/dL | VLDL-5-Phospholipids |
| 59 | L1TG | LDL-1 Subclass | Triglycerides | mg/dL | LDL-1-Triglyceride |
| 60 | L2TG | LDL-2 Subclass | Triglycerides | mg/dL | LDL-2-Triglyceride |
| 61 | L3TG | LDL-3 Subclass | Triglycerides | mg/dL | LDL-3-Triglyceride |
| 62 | L4TG | LDL-4 Subclass | Triglycerides | mg/dL | LDL-4-Triglyceride |
| 63 | L5TG | LDL-5 Subclass | Triglycerides | mg/dL | LDL-5-Triglyceride |
| 64 | L6TG | LDL-6 Subclass | Triglycerides | mg/dL | LDL-6-Triglyceride |
| 65 | L1CH | LDL-1 Subclass | Cholesterol | mg/dL | LDL-1-Cholesterol |
| 66 | L2CH | LDL-2 Subclass | Cholesterol | mg/dL | LDL-2-Cholesterol |
| 67 | L3CH | LDL-3 Subclass | Cholesterol | mg/dL | LDL-3-Cholesterol |
| 68 | L4CH | LDL-4 Subclass | Cholesterol | mg/dL | LDL-4-Cholesterol |
| 69 | L5CH | LDL-5 Subclass | Cholesterol | mg/dL | LDL-5-Cholesterol |
| 70 | L6CH | LDL-6 Subclass | Cholesterol | mg/dL | LDL-6-Cholesterol |
| 71 | L1FC | LDL-1 Subclass | Free Cholesterol | mg/dL | LDL-1-Free Cholesterol |
| 72 | L2FC | LDL-2 Subclass | Free Cholesterol | mg/dL | LDL-2-Free Cholesterol |
| 73 | L3FC | LDL-3 Subclass | Free Cholesterol | mg/dL | LDL-3-Free Cholesterol |
| 74 | L4FC | LDL-4 Subclass | Free Cholesterol | mg/dL | LDL-4-Free Cholesterol |
| 75 | L5FC | LDL-5 Subclass | Free Cholesterol | mg/dL | LDL-5-Free Cholesterol |
| 76 | L6FC | LDL-6 Subclass | Free Cholesterol | mg/dL | LDL-6-Free Cholesterol |
| 77 | L1PL | LDL-1 Subclass | Phospholipids | mg/dL | LDL-1-Phospholipids |
| 78 | L2PL | LDL-2 Subclass | Phospholipids | mg/dL | LDL-2-Phospholipids |
| 79 | L3PL | LDL-3 Subclass | Phospholipids | mg/dL | LDL-3-Phospholipids |
| 80 | L4PL | LDL-4 Subclass | Phospholipids | mg/dL | LDL-4-Phospholipids |
| 81 | L5PL | LDL-5 Subclass | Phospholipids | mg/dL | LDL-5-Phospholipids |
| 82 | L6PL | LDL-6 Subclass | Phospholipids | mg/dL | LDL-6-Phospholipids |
| 83 | L1AB | LDL-1 Subclass | Apolipoprotein B100 | mg/dL | LDL-1-Apo B100 |
| 84 | L2AB | LDL-2 Subclass | Apolipoprotein B100 | mg/dL | LDL-2-Apo B100 |
| 85 | L3AB | LDL-3 Subclass | Apolipoprotein B100 | mg/dL | LDL-3-Apo B100 |
| 86 | L4AB | LDL-4 Subclass | Apolipoprotein B100 | mg/dL | LDL-4-Apo B100 |
| 87 | L5AB | LDL-5 Subclass | Apolipoprotein B100 | mg/dL | LDL-5-Apo B100 |
| 88 | L6AB | LDL-6 Subclass | Apolipoprotein B100 | mg/dL | LDL-6-Apo B100 |
| 89 | H1TG | HDL-1 Subclass | Triglycerides | mg/dL | HDL-1-Triglyceride |
| 90 | H2TG | HDL-2 Subclass | Triglycerides | mg/dL | HDL-2-Triglyceride |
| 91 | H3TG | HDL-3 Subclass | Triglycerides | mg/dL | HDL-3-Triglyceride |
| 92 | H4TG | HDL-4 Subclass | Triglycerides | mg/dL | HDL-4-Triglyceride |
| 93 | H1CH | HDL-1 Subclass | Cholesterol | mg/dL | HDL-1-Cholesterol |
| 94 | H2CH | HDL-2 Subclass | Cholesterol | mg/dL | HDL-2-Cholesterol |
| 95 | H3CH | HDL-3 Subclass | Cholesterol | mg/dL | HDL-3-Cholesterol |
| 96 | H4CH | HDL-4 Subclass | Cholesterol | mg/dL | HDL-4-Cholesterol |
| 97 | H1FC | HDL-1 Subclass | Free Cholesterol | mg/dL | HDL-1-Free Cholesterol |
| 98 | H2FC | HDL-2 Subclass | Free Cholesterol | mg/dL | HDL-2-Free Cholesterol |
| 99 | H3FC | HDL-3 Subclass | Free Cholesterol | mg/dL | HDL-3-Free Cholesterol |
| 100 | H4FC | HDL-4 Subclass | Free Cholesterol | mg/dL | HDL-4-Free Cholesterol |
| 101 | H1PL | HDL-1 Subclass | Phospholipids | mg/dL | HDL-1-Phospholipids |
| 102 | H2PL | HDL-2 Subclass | Phospholipids | mg/dL | HDL-2-Phospholipids |
| 103 | H3PL | HDL-3 Subclass | Phospholipids | mg/dL | HDL-3-Phospholipids |
| 104 | H4PL | HDL-4 Subclass | Phospholipids | mg/dL | HDL-4-Phospholipids |
| 105 | H1A1 | HDL-1 Subclass | Apolipoprotein A1 | mg/dL | HDL-1-Apo A1 |
| 106 | H2A1 | HDL-2 Subclass | Apolipoprotein A1 | mg/dL | HDL-2-Apo A1 |
| 107 | H3A1 | HDL-3 Subclass | Apolipoprotein A1 | mg/dL | HDL-3-Apo A1 |
| 108 | H4A1 | HDL-4 Subclass | Apolipoprotein A1 | mg/dL | HDL-4-Apo A1 |
| 109 | H1A2 | HDL-1 Subclass | Apolipoprotein A2 | mg/dL | HDL-1-Apo A2 |
| 110 | H2A2 | HDL-2 Subclass | Apolipoprotein A2 | mg/dL | HDL-2-Apo A2 |
| 111 | H3A2 | HDL-3 Subclass | Apolipoprotein A2 | mg/dL | HDL-3-Apo A2 |
| 112 | H4A2 | HDL-4 Subclass | Apolipoprotein A2 | mg/dL | HDL-4-Apo A2 |

| **Supplementary Table 2** Density ranges of lipoproteins and lipoprotein subclasses | | | | |
| --- | --- | --- | --- | --- |
| **Range to kg/L** | | | | |
| *Main lipoprotein fractions* | | | | |
| VLDL |  |  |  | 0.950−1.006 |
| IDL |  |  |  | 1.006−1.019 |
| LDL |  |  |  | 1.019−1.063 |
| HDL |  |  |  | 1.063−1.210 |
| *Low-density lipoprotein subclasses* | | | | |
| LDL-1 |  |  |  | 1.019−1.031 |
| LDL-2 |  |  |  | 1.031−1.034 |
| LDL-3 |  |  |  | 1.034−1.037 |
| LDL-4 |  |  |  | 1.037−1.040 |
| LDL-5 |  |  |  | 1.040−1.044 |
| LDL-6 |  |  |  | 1.044−1.063 |
| *High-density lipoprotein subclasses* | | | | |
| HDL-1 |  |  |  | 1.063−1.100 |
| HDL-2 |  |  |  | 1.100−1.112 |
| HDL-3 |  |  |  | 1.112−1.125 |
| HDL-4 |  |  |  | 1.125−1.210 |
| Abbreviations: VLDL, very-low-density lipoprotein; IDL, intermediate-density lipoprotein; LDL, low-density lipoprotein; HDL, high-density lipoprotein | | | | |

| **Supplementary Table 3** Comparison of Lp(a) values below the limit of detection (LOD < 7 mg/dL) between LOD/2 and LOD/√2 | | | | | | | | | | | | | | | | | | |
| --- | --- | --- | --- | --- | --- | --- | --- | --- | --- | --- | --- | --- | --- | --- | --- | --- | --- | --- |
| **variable** | | **Control** | | **T2DM** | | | | ***p value*a** | ***p val*ueb** | **All** | | **CVD** | | | | | | ***p valuec*** |
| **not received** | | **received** | | **not received** | | | **received** | | |
| **mean** | **± SD** | **mean** | **± SD** | **mean** | **± SD** | **mean** | **± SD** | | **mean** | **± SD** | **mean** | | **± SD** |
| Lp(a) | | | | | | | | | | | | | | | | | | |
|  | LOD/2 estimate | 30.0 | ± 40.91 | 73.9 | ± 95.46 | 53.3 | ± 83.34 | 0.436 | **0.012** | 42.8 | ± 40.09 | | 3.5 | - | 45.9 | | ± 40.03 | 0.301 |
|  | LOD/√2 estimate | 30.3 | ± 40.73 | 74.1 | ± 95.31 | 53.7 | ± 83.11 | 0.392 | **0.012** | 43.1 | ± 39.77 | | 5.0 | - | 46.1 | | ± 39.78 | 0.461 |
|  | ***p value (Paired t test)*** | 0.101 | | 0.089 | | 0.061 | |  |  | 0.082 | | | *na* | | | 0.165 | |  |
|  | Data are expressed as mean and standard deviation. The T2DM group was diagnosed based on ICD-10 codes E11–E14, and the CVD group was diagnosed based on ICD-10 codes I20–I25 and I60–I64. "not received" refers to participants not receiving lipid-lowering drugs (statins); "received" refers to participants receiving lipid-lowering drugs (statins). T2DM, type 2 diabetes mellitus; CVD, cardiovascular diseases; Lp(a), lipoprotein (a); LOD, limit of detection.  a Statistically significant difference between "not received" and "received" groups in the T2DM  b Statistically significant difference between "not received" in the T2DM compared to the control group  c Statistically significant difference between all of the CVD group compared to the control group.  *p* value in bold indicate significant differences (*p* < 0.05), analyzed by Mann-Whitney U test and Paired t test. | | | | | | | | | | | | | | | | | |

| **Supplementary Table 4** Medication history of participants in T2DM and CVD group (case group) | | | | | | | |
| --- | --- | --- | --- | --- | --- | --- | --- |
| **variable** | | | **T2DM** | | **CVD** | | ***p value*** |
| ***n*=52** | | ***n*=14** | |
| Duration of diagnosis, years | | |  |  |  |  | 0.867 |
|  | <5 | | 31 | (59.62) | 8 | (57.14) |  |
|  | ≥5 | | 21 | (40.38) | 6 | (42.86) |  |
| Lipid-lowering drugs | | |  |  |  |  | **0.048** |
|  | Not received | | 19 | (36.54) | 1 | (7.14) |  |
|  | Received | | 33 | (63.46) | 13 | (92.86) |  |
|  |  | Atorvastatin |  |  |  |  | 0.148 |
|  |  | 10 mg daily | 3 | (16.67) | 1 | (9.09) |  |
|  |  | 20 mg daily | 8 | (44.44) | 1 | (9.09) |  |
|  |  | 40 mg daily | 6 | (33.33) | 8 | (72.73) |  |
|  |  | 80 mg daily | 1 | (5.56) | 1 | (9.09) |  |
|  |  | Simvastatin |  |  |  |  | 0.215 |
|  |  | 5 mg daily | 1 | (8.33) | 0 | (0.00) |  |
|  |  | 10 mg daily | 2 | (16.67) | 1 | (50.00) |  |
|  |  | 20 mg daily | 8 | (66.67) | 0 | (0.00) |  |
|  |  | 40 mg daily | 1 | (8.33) | 1 | (50.00 |  |
|  |  | Rosuvastatin |  |  |  |  | *na* |
|  |  | 10 mg daily | 1 | (50.00) | 0 | (0.00) |  |
|  |  | 20 mg daily | 1 | (50.00) | 0 | (0.00) |  |
|  |  | Gemfibrozil |  |  |  |  | *na* |
|  |  | 300 mg daily | 1 | (100.00) | 0 | (0.00) |  |
|  |  | 600 mg daily | 0 | (0.00) | 0 | (0.00) |  |
|  |  | Fibrate |  |  |  |  | *na* |
|  |  | 200 mg daily | 1 | (100.00) | 0 | (0.00) |  |
|  |  | Ezetimibe |  |  |  |  | *na* |
|  |  | 5 mg daily | 0 | (00.00) | 1 | (50.00) |  |
|  |  | 10 mg daily | 0 | (00.00) | 1 | (50.00) |  |
| Data are expressed as frequency (n) and percentage (%). The T2DM group was diagnosed based on ICD-10 codes E11–E14. The CVD group was diagnosed based on ICD-10 codes I20–I25 and I60–I64.  In the T2DM group, one patient received combination therapy: atorvastatin with simvastatin (*n* = 1)  In the CVD group, two patients received combination therapy: ezetimibe with atorvastatin (*n* = 1), and ezetimibe with simvastatin (*n* = 1).  T2DM, type 2 diabetes mellitus; CVD, cardiovascular diseases. *p* value in bold indicate significant differences (*p* < 0.05), analyzed by Mann-Whitney U test. | | | | | | | |

| **Supplementary Table 5** Comparison of triglyceride, cholesterol, free cholesterol, phospholipids, and apolipoprotein concentration and particle size of lipoprotein between groups | | | | | | | | | | | | | | | | |
| --- | --- | --- | --- | --- | --- | --- | --- | --- | --- | --- | --- | --- | --- | --- | --- | --- |
| **variable** | | **Control** | | **T2DM** | | | | ***p* valuea** | ***p* valueb** | **CVD** | | | | | | ***p* valuec** |
| **not received** | | **received** | | **All** | | **not received** | | **received** | |
| **mean** | **± SD** | **mean** | **± SD** | **mean** | **± SD** | **mean** | **± SD** | **mean** | **± SD** | **mean** | **± SD** |
| *Triglyceride to cholesterol to free cholesterol to phospholipids to and apolipoprotein distribution* | | | | | | | | | | | | | | | | |
|  | VLDL-triglyceride | 60.1 | ± 28.83 | 83.5 | ± 30.20 | 100.3 | ± 52.02 | 0.189 | **0.003** | 79.9 | ± 35.39 | 89.5 | - | 79.2 | ± 36.73 | **0.033** |
|  | IDL-triglyceride | 6.7 | ± 5.81 | 11.1 | ± 6.24 | 14.4 | ± 11.62 | 0.242 | **0.006** | 10.3 | ± 7.63 | 11.4 | - | 10.2 | ± 7.93 | 0.062 |
|  | LDL-triglyceride | 18.5 | ± 4.40 | 20.6 | ± 5.00 | 18.9 | ± 4.91 | 0.219 | 0.080 | 19.7 | ± 4.72 | 16.0 | - | 20.0 | ± 4.79 | 0.371 |
|  | HDL-triglyceride | 10.6 | ± 3.61 | 10.9 | ± 2.98 | 11.3 | ± 2.62 | 0.587 | 0.789 | 11.9 | ± 2.54 | 11.6 | - | 11.9 | ± 2.64 | 0.228 |
|  | VLDL-cholesterol | 14.1 | ± 7.86 | 18.6 | ± 8.89 | 20.9 | ± 12.86 | 0.486 | **0.035** | 19.0 | ± 10.47 | 20.8 | - | 18.8 | ± 10.88 | 0.061 |
|  | IDL-cholesterol | 9.4 | ± 3.71 | 13.2 | ± 4.78 | 11.7 | ± 6.28 | 0.363 | **<0.001** | 11.4 | ± 6.13 | 9.1 | - | 11.6 | ± 6.34 | 0.120 |
|  | VLDL-free cholesterol | 7.7 | ± 3.07 | 9.8 | ± 3.18 | 10.9 | ± 5.31 | 0.413 | **0.009** | 9.6 | ± 3.90 | 10.1 | - | 9.5 | ± 4.06 | 0.057 |
|  | IDL-free cholesterol | 2.5 | ± 1.07 | 3.5 | ± 1.32 | 3.1 | ± 1.72 | 0.307 | **0.001** | 3.0 | ± 1.70 | 2.2 | - | 3.0 | ± 1.75 | 0.188 |
|  | LDL-free cholesterol | 37.1 | ± 6.90 | 39.4 | ± 7.18 | 30.7 | ± 9.83 | **0.001** | 0.217 | 29.3 | ± 7.51 | 22.5 | - | 29.9 | ± 7.55 | **<0.001** |
|  | HDL-free cholesterol | 15.1 | ± 3.86 | 14.4 | ± 3.08 | 12.3 | ± 2.53 | **0.008** | 0.490 | 12.6 | ± 3.05 | 9.7 | - | 12.8 | ± 3.06 | **0.029** |
|  | VLDL-phospholipids | 16.2 | ± 6.86 | 21.1 | ± 7.42 | 24.4 | ± 11.77 | 0.264 | **0.009** | 20.9 | ± 7.86 | 21.9 | - | 20.8 | ± 8.17 | **0.031** |
|  | IDL-phospholipids | 4.8 | ± 2.16 | 6.6 | ± 2.45 | 6.4 | ± 4.09 | 0.806 | **0.003** | 4.9 | ± 3.12 | 4.1 | - | 5.0 | ± 3.24 | 0.886 |
|  | LDL-phospholipids | 68.1 | ± 11.99 | 71.7 | ± 13.23 | 56.7 | ± 17.33 | **0.002** | 0.262 | 53.8 | ± 13.89 | 39.4 | - | 55.0 | ± 13.79 | **<0.001** |
|  | HDL-phospholipids | 80.3 | ± 18.75 | 75.3 | ± 15.45 | 68.6 | ± 11.26 | 0.077 | 0.285 | 68.0 | ± 15.19 | 50.3 | - | 69.3 | ± 14.90 | **0.028** |
|  | HDL-ApoA1 | 158.0 | ± 27.11 | 155.2 | ± 21.10 | 144.3 | ± 17.50 | **0**.**049** | 0.677 | 138.0 | ± 21.81 | 110.8 | - | 140.0 | ± 21.20 | **0.013** |
|  | HDL-ApoA2 | 32.4 | ± 4.14 | 33.1 | ± 3.68 | 31.6 | ± 3.71 | 0.180 | 0.536 | 29.3 | ± 4.62 | 23.4 | - | 29.8 | ± 4.47 | **0.017** |
|  | VLDL-ApoB100 | 6.0 | ± 2.55 | 7.9 | ± 2.67 | 8.8 | ± 4.10 | 0.400 | **0.006** | 8.0 | ± 3.07 | 8.3 | - | 8.0 | ± 3.19 | **0.016** |
|  | IDL-ApoB100 | 3.4 | ± 1.38 | 4.6 | ± 1.67 | 4.1 | ± 1.77 | 0.288 | **0.002** | 4.3 | ± 1.95 | 3.2 | - | 4.3 | ± 2.00 | 0.075 |
|  | LDL-ApoB100 | 76.4 | ± 14.72 | 82.1 | ± 18.22 | 66.5 | ± 23.15 | **0.013** | 0.166 | 62.0 | ± 17.28 | 46.2 | - | 63.2 | ± 17.36 | **0.003** |
|  | VLDL-1-triglyceride | 25.3 | ± 17.24 | 38.8 | ± 18.23 | 50.6 | ± 29.16 | 0.106 | **0.004** | 37.8 | ± 21.26 | 50.1 | - | 36.9 | ± 21.82 | **0.025** |
|  | VLDL-2-triglyceride | 10.3 | ± 5.63 | 14.0 | ± 6.18 | 16.6 | ± 10.81 | 0.321 | **0.015** | 13.6 | ± 6.61 | 15.2 | - | 13.4 | ± 6.86 | 0.066 |
|  | VLDL-3-triglyceride | 8.9 | ± 4.32 | 11.9 | ± 4.85 | 13.4 | ± 8.17 | 0.450 | **0.010** | 11.5 | ± 5.80 | 10.7 | - | 11.5 | ± 6.03 | 0.069 |
|  | VLDL-4-triglyceride | 6.9 | ± 2.37 | 9.5 | ± 2.72 | 10.2 | ± 4.50 | 0.536 | **<0.001** | 9.2 | ± 3.44 | 7.2 | - | 9.4 | ± 3.53 | **0.005** |
|  | VLDL-5-triglyceride | 2.6 | ± 0.60 | 3.0 | ± 0.47 | 3.1 | ± 0.79 | 0.604 | **0.009** | 3.1 | ± 0.48 | 2.9 | - | 3.1 | ± 0.49 | **0.008** |
|  | VLDL-1-cholesterol | 4.8 | ± 3.25 | 6.4 | ± 3.52 | 8.1 | ± 5.17 | 0.205 | 0.068 | 6.9 | ± 4.13 | 9.5 | - | 6.7 | ± 4.23 | 0.052 |
|  | VLDL-2-cholesterol | 2.3 | ± 1.48 | 2.9 | ± 1.91 | 3.2 | ± 2.56 | 0.579 | 0.202 | 2.8 | ± 2.00 | 3.2 | - | 2.8 | ± 2.08 | 0.274 |
|  | VLDL-3-cholesterol | 2.6 | ± 1.66 | 3.4 | ± 2.01 | 3.7 | ± 2.52 | 0.626 | 0.080 | 3.4 | ± 2.33 | 3.3 | - | 3.4 | ± 2.43 | 0.141 |
|  | VLDL-4-cholesterol | 3.2 | ± 1.76 | 4.4 | ± 2.18 | 4.5 | ± 2.74 | 0.929 | **0.018** | 4.5 | ± 2.58 | 3.3 | - | 4.5 | ± 2.66 | 0.**040** |
|  | VLDL-5-cholesterol | 1.1 | ± 0.39 | 1.2 | ± 0.34 | 1.2 | ± 0.49 | 0.956 | 0.366 | 1.2 | ± 0.39 | 1.0 | - | 1.2 | ± 0.40 | 0.274 |
|  | VLDL-1-free cholesterol | 1.5 | ± 1.38 | 2.3 | ± 1.42 | 2.9 | ± 2.05 | 0.219 | 0.**037** | 2.2 | ± 1.47 | 3.2 | - | 2.1 | ± 1.50 | 0.108 |
|  | VLDL-2-free cholesterol | 1.0 | ± 0.67 | 1.3 | ± 0.79 | 1.5 | ± 1.12 | 0.558 | 0.100 | 1.3 | ± 0.89 | 1.6 | - | 1.2 | ± 0.92 | 0.223 |
|  | VLDL-3-free cholesterol | 1.0 | ± 0.74 | 1.5 | ± 0.80 | 1.7 | ± 1.18 | 0.398 | **0.026** | 1.5 | ± 0.97 | 1.6 | - | 1.5 | ± 1.00 | 0.065 |
|  | VLDL-4-free cholesterol | 1.3 | ± 0.74 | 1.9 | ± 0.92 | 1.9 | ± 1.16 | 0.812 | **0.003** | 1.9 | ± 1.11 | 1.7 | - | 1.9 | ± 1.15 | **0.017** |
|  | VLDL-5-free cholesterol | 0.5 | ± 0.24 | 0.6 | ± 0.22 | 0.5 | ± 0.32 | 0.905 | 0.265 | 0.7 | ± 0.28 | 0.6 | - | 0.7 | ± 0.29 | **0.029** |
|  | VLDL-1-phospholipids | 3.8 | ± 2.99 | 5.7 | ± 3.26 | 7.7 | ± 4.84 | 0.116 | **0.017** | 5.9 | ± 3.42 | 8.1 | - | 5.7 | ± 3.50 | **0.030** |
|  | VLDL-2-phospholipids | 2.6 | ± 1.49 | 3.4 | ± 1.69 | 4.0 | ± 2.54 | 0.322 | 0.057 | 3.3 | ± 1.66 | 3.8 | - | 3.3 | ± 1.72 | 0.115 |
|  | VLDL-3-phospholipids | 2.7 | ± 1.47 | 3.6 | ± 1.69 | 4.1 | ± 2.40 | 0.445 | **0.021** | 3.5 | ± 1.86 | 3.5 | - | 3.5 | ± 1.94 | 0.073 |
|  | VLDL-4-phospholipids | 3.2 | ± 1.26 | 4.4 | ± 1.48 | 4.6 | ± 2.10 | 0.763 | **0.001** | 4.4 | ± 1.81 | 3.8 | - | 4.5 | ± 1.88 | **0.007** |
|  | VLDL-5-phospholipids | 1.5 | ± 0.45 | 1.7 | ± 0.35 | 1.8 | ± 0.62 | 0.694 | 0.138 | 1.8 | ± 0.41 | 1.7 | - | 1.8 | ± 0.43 | 0.060 |
|  | LDL-1-triglyceride | 4.9 | ± 1.65 | 5.6 | ± 1.45 | 4.9 | ± 1.40 | 0.088 | 0.133 | 5.5 | ± 1.40 | 3.9 | - | 5.6 | ± 1.38 | 0.252 |
|  | LDL-2-triglyceride | 2.2 | ± 0.65 | 2.3 | ± 0.71 | 1.6 | ± 0.49 | **<0.001** | 0.853 | 1.9 | ± 0.42 | 1.1 | - | 1.9 | ± 0.37 | 0.079 |
|  | LDL-3-triglyceride | 2.4 | ± 0.58 | 2.5 | ± 0.52 | 2.0 | ± 0.61 | **0.004** | 0.420 | 2.2 | ± 0.47 | 1.7 | - | 2.3 | ± 0.46 | 0.350 |
|  | LDL-4-triglyceride | 2.7 | ± 0.84 | 2.9 | ± 1.10 | 2.6 | ± 0.73 | 0.183 | 0.418 | 2.9 | ± 0.74 | 2.1 | - | 2.9 | ± 0.74 | 0.559 |
|  | LDL-5-triglyceride | 2.3 | ± 1.03 | 2.7 | ± 1.42 | 2.8 | ± 1.21 | 0.828 | 0.222 | 2.7 | ± 1.09 | 2.2 | - | 2.7 | ± 1.13 | 0.240 |
|  | LDL-6-triglyceride | 3.4 | ± 1.06 | 4.0 | ± 1.29 | 4.3 | ± 1.53 | 0.397 | 0.063 | 4.0 | ± 1.32 | 3.4 | - | 4.0 | ± 1.36 | 0.101 |
|  | LDL-1-cholesterol | 22.2 | ± 6.07 | 22.4 | ± 6.61 | 15.3 | ± 6.36 | **<0.001** | 0.919 | 16.2 | ± 6.52 | 10.0 | - | 16.7 | ± 6.53 | **0.002** |
|  | LDL-2-cholesterol | 19.0 | ± 7.42 | 18.6 | ± 6.86 | 10.5 | ± 5.53 | **<0.001** | 0.826 | 10.2 | ± 4.29 | 8.4 | - | 10.4 | ± 4.43 | **<0.001** |
|  | LDL-3-cholesterol | 21.0 | ± 6.71 | 21.3 | ± 6.31 | 13.1 | ± 6.98 | **<0.001** | 0.871 | 12.7 | ± 4.88 | 8.7 | - | 13.0 | ± 4.93 | **<0.001** |
|  | LDL-4-cholesterol | 21.7 | ± 5.72 | 23.3 | ± 7.10 | 17.5 | ± 7.52 | **0.008** | 0.311 | 16.8 | ± 5.83 | 11.5 | - | 17.2 | ± 5.85 | **0.006** |
|  | LDL-5-cholesterol | 17.9 | ± 5.89 | 21.2 | ± 8.42 | 19.5 | ± 7.96 | 0.466 | 0.066 | 16.5 | ± 7.21 | 13.2 | - | 16.8 | ± 7.44 | 0.456 |
|  | LDL-6-cholesterol | 20.4 | ± 6.52 | 23.8 | ± 8.27 | 24.1 | ± 9.98 | 0.908 | 0.070 | 19.7 | ± 7.60 | 15.3 | - | 20.0 | ± 7.80 | 0.711 |
|  | LDL-1-free cholesterol | 6.7 | ± 1.73 | 7.0 | ± 1.79 | 4.9 | ± 1.94 | **<0.001** | 0.561 | 5.1 | ± 1.84 | 3.2 | - | 5.3 | ± 1.83 | **0.004** |
|  | LDL-2-free cholesterol | 6.2 | ± 2.23 | 6.2 | ± 2.05 | 3.9 | ± 1.62 | **<0.001** | 0.961 | 3.8 | ± 1.27 | 2.8 | - | 3.9 | ± 1.29 | **<0.001** |
|  | LDL-3-free cholesterol | 7.0 | ± 1.92 | 7.1 | ± 1.63 | 4.9 | ± 1.92 | **<0.001** | 0.905 | 4.8 | ± 1.47 | 3.1 | - | 4.9 | ± 1.44 | **<0.001** |
|  | LDL-4-free cholesterol | 6.7 | ± 1.39 | 7.1 | ± 1.53 | 5.6 | ± 1.88 | **0.004** | 0.206 | 5.4 | ± 1.59 | 3.8 | - | 5.5 | ± 1.58 | **0.004** |
|  | LDL-5-free cholesterol | 5.5 | ± 1.33 | 6.3 | ± 1.91 | 5.8 | ± 1.91 | 0.334 | **0.042** | 5.1 | ± 1.76 | 4.0 | - | 5.2 | ± 1.80 | 0.408 |
|  | LDL-6-free cholesterol | 5.6 | ± 1.45 | 6.5 | ± 1.77 | 6.5 | ± 2.25 | 0.969 | **0.042** | 5.4 | ± 1.66 | 4.3 | - | 5.5 | ± 1.70 | 0.619 |
|  | LDL-1-phospholipids | 12.6 | ± 3.11 | 12.7 | ± 3.29 | 9.3 | ± 3.02 | **<0.001** | 0.889 | 10.0 | ± 3.21 | 6.6 | - | 10.2 | ± 3.18 | **0.007** |
|  | LDL-2-phospholipids | 10.5 | ± 3.70 | 10.2 | ± 3.43 | 6.1 | ± 2.79 | **<0.001** | 0.757 | 6.1 | ± 2.18 | 5.0 | - | 6.2 | ± 2.24 | **<0.001** |
|  | LDL-3-phospholipids | 11.6 | ± 3.23 | 11.6 | ± 3.00 | 7.5 | ± 3.48 | **<0.001** | 0.967 | 7.5 | ± 2.42 | 5.4 | - | 7.7 | ± 2.43 | **<0.001** |
|  | LDL-4-phospholipids | 11.8 | ± 2.85 | 12.6 | ± 3.54 | 9.7 | ± 3.75 | **0.008** | 0.339 | 9.5 | ± 2.93 | 6.7 | - | 9.7 | ± 2.92 | **0.009** |
|  | LDL-5-phospholipids | 9.8 | ± 2.94 | 11.3 | ± 4.21 | 10.5 | ± 3.89 | 0.482 | 0.075 | 9.2 | ± 3.56 | 7.4 | - | 9.3 | ± 3.67 | 0.546 |
|  | LDL-6-phospholipids | 11.4 | ± 3.09 | 12.9 | ± 3.91 | 13.1 | ± 4.68 | 0.890 | 0.081 | 11.1 | ± 3.71 | 8.5 | - | 11.3 | ± 3.78 | 0.714 |
|  | LDL-1-ApoB100 | 11.9 | ± 3.01 | 12.1 | ± 3.22 | 8.9 | ± 3.04 | **0.001** | 0.806 | 9.5 | ± 2.98 | 6.4 | - | 9.8 | ± 2.95 | **0.009** |
|  | LDL-2-ApoB100 | 10.6 | ± 3.62 | 10.5 | ± 3.43 | 6.4 | ± 2.84 | **<0.001** | 0.880 | 6.4 | ± 1.99 | 5.7 | - | 6.5 | ± 2.06 | **<0.001** |
|  | LDL-3-ApoB100 | 12.2 | ± 3.41 | 12.5 | ± 3.29 | 8.1 | ± 3.75 | **<0.001** | 0.759 | 8.1 | ± 2.46 | 6.2 | - | 8.3 | ± 2.49 | **<0.001** |
|  | LDL-4-ApoB100 | 13.3 | ± 3.43 | 14.4 | ± 4.38 | 11.2 | ± 4.36 | **0.013** | 0.255 | 10.9 | ± 3.29 | 8.1 | - | 11.2 | ± 3.31 | **0.023** |
|  | LDL-5-ApoB100 | 12.3 | ± 4.13 | 14.6 | ± 5.85 | 13.7 | ± 5.53 | 0.598 | 0.059 | 11.8 | ± 4.98 | 9.6 | - | 12.0 | ± 5.14 | 0.735 |
|  | LDL-6-ApoB100 | 16.5 | ± 5.39 | 19.1 | ± 6.60 | 19.6 | ± 8.24 | 0.807 | 0.086 | 16.6 | ± 6.35 | 13.6 | - | 16.8 | ± 6.55 | 0.948 |
|  | HDL-1-triglyceride | 3.5 | ± 1.80 | 3.4 | ± 1.29 | 3.3 | ± 0.97 | 0.838 | 0.757 | 3.6 | ± 1.18 | 3.3 | - | 3.6 | ± 1.22 | 0.838 |
|  | HDL-2-triglyceride | 1.8 | ± 0.75 | 1.8 | ± 0.65 | 1.8 | ± 0.51 | 0.802 | 0.911 | 2.0 | ± 0.47 | 2.1 | - | 2.0 | ± 0.49 | 0.287 |
|  | HDL-3-triglyceride | 2.1 | ± 0.77 | 2.2 | ± 0.74 | 2.3 | ± 0.68 | 0.591 | 0.631 | 2.4 | ± 0.51 | 2.4 | - | 2.4 | ± 0.53 | 0.124 |
|  | HDL-4-triglyceride | 3.4 | ± 0.91 | 3.6 | ± 0.96 | 3.9 | ± 0.90 | 0.266 | 0.249 | 3.9 | ± 0.80 | 3.7 | - | 4.0 | ± 0.83 | **0.032** |
|  | HDL-1-cholesterol | 17.7 | ± 8.12 | 16.0 | ± 6.23 | 12.9 | ± 4.01 | **0.034** | 0.401 | 12.3 | ± 5.95 | 6.2 | - | 12.8 | ± 5.92 | **0.024** |
|  | HDL-2-cholesterol | 8.7 | ± 2.88 | 8.1 | ± 2.54 | 7.0 | ± 1.50 | 0.067 | 0.387 | 6.7 | ± 2.12 | 4.5 | - | 6.9 | ± 2.10 | **0.019** |
|  | HDL-3-cholesterol | 10.6 | ± 2.37 | 10.3 | ± 2.11 | 9.3 | ± 1.86 | 0.076 | 0.571 | 9.0 | ± 2.09 | 6.1 | - | 9.3 | ± 1.99 | **0.026** |
|  | HDL-4-cholesterol | 20.8 | ± 3.53 | 21.4 | ± 3.12 | 20.6 | ± 3.65 | 0.421 | 0.466 | 18.4 | ± 3.57 | 13.5 | - | 18.7 | ± 3.42 | **0.026** |
|  | HDL-1-free cholesterol | 5.0 | ± 1.99 | 4.6 | ± 1.46 | 3.4 | ± 1.11 | **0.002** | 0.349 | 3.6 | ± 1.51 | 2.2 | - | 3.7 | ± 1.52 | **0.016** |
|  | HDL-2-free cholesterol | 2.2 | ± 0.65 | 2.1 | ± 0.58 | 1.7 | ± 0.42 | **0.015** | 0.540 | 1.8 | ± 0.53 | 1.3 | - | 1.8 | ± 0.52 | **0.044** |
|  | HDL-3-free cholesterol | 2.7 | ± 0.57 | 2.7 | ± 0.49 | 2.3 | ± 0.48 | **0.004** | 0.961 | 2.2 | ± 0.53 | 1.3 | - | 2.3 | ± 0.49 | **0.004** |
|  | HDL-4-free cholesterol | 4.8 | ± 0.76 | 5.0 | ± 0.64 | 4.7 | ± 0.83 | 0.152 | 0.176 | 4.3 | ± 0.83 | 3.0 | - | 4.4 | ± 0.76 | 0.067 |
|  | HDL-1-phospholipids | 21.6 | ± 10.30 | 18.7 | ± 7.82 | 15.2 | ± 4.65 | **0.048** | 0.263 | 15.8 | ± 7.50 | 10.1 | - | 16.3 | ± 7.61 | 0.057 |
|  | HDL-2-phospholipids | 13.3 | ± 4.46 | 12.1 | ± 3.91 | 10.8 | ± 2.54 | 0.145 | 0.288 | 10.9 | ± 3.27 | 8.1 | - | 11.1 | ± 3.30 | 0.063 |
|  | HDL-3-phospholipids | 16.6 | ± 4.02 | 15.8 | ± 3.66 | 14.7 | ± 3.26 | 0.228 | 0.431 | 14.5 | ± 3.48 | 10.2 | - | 14.8 | ± 3.39 | 0.076 |
|  | HDL-4-phospholipids | 28.0 | ± 4.16 | 28.1 | ± 3.84 | 27.2 | ± 4.25 | 0.448 | 0.938 | 25.7 | ± 3.78 | 19.9 | - | 26.2 | ± 3.53 | 0.069 |
|  | HDL-1-ApoA1 | 29.0 | ± 15.04 | 24.9 | ± 11.38 | 20.0 | ± 6.49 | 0.053 | 0.272 | 20.8 | ± 10.31 | 15.6 | - | 21.2 | ± 10.62 | 0.060 |
|  | HDL-2-ApoA1 | 18.6 | ± 5.40 | 17.2 | ± 4.14 | 15.7 | ± 3.41 | 0.147 | 0.305 | 16.0 | ± 4.15 | 11.6 | - | 16.4 | ± 4.11 | 0.104 |
|  | HDL-3-ApoA1 | 28.4 | ± 6.25 | 27.6 | ± 5.38 | 25.6 | ± 4.81 | 0.169 | 0.605 | 25.2 | ± 4.94 | 19.3 | - | 25.7 | ± 4.83 | 0.089 |
|  | HDL-4-ApoA1 | 80.3 | ± 10.51 | 83.1 | ± 8.41 | 81.2 | ± 11.41 | 0.508 | 0.274 | 74.9 | ± 11.32 | 62.2 | - | 75.9 | ± 11.16 | 0.097 |
|  | HDL-1-ApoA2 | 2.6 | ± 1.44 | 2.2 | ± 1.06 | 1.6 | ± 0.72 | **0.029** | 0.251 | 1.8 | ± 1.18 | 1.0 | - | 1.9 | ± 1.20 | 0.078 |
|  | HDL-2-ApoA2 | 3.3 | ± 1.06 | 3.2 | ± 0.81 | 2.8 | ± 0.84 | 0.065 | 0.576 | 2.8 | ± 0.91 | 1.9 | - | 2.9 | ± 0.91 | 0.081 |
|  | HDL-3-ApoA2 | 6.3 | ± 1.33 | 6.3 | ± 1.22 | 5.9 | ± 1.19 | 0.163 | 0.931 | 5.7 | ± 1.21 | 4.1 | - | 5.8 | ± 1.17 | 0.141 |
|  | HDL-4-ApoA2 | 19.3 | ± 3.35 | 20.3 | ± 2.82 | 20.1 | ± 3.09 | 0.783 | 0.199 | 17.9 | ± 3.20 | 14.4 | - | 18.2 | ± 3.15 | 0.178 |
| Data are expressed as mean ± standard deviation. The T2DM group was diagnosed based on ICD-10 codes E11–E14, and the CVD group was diagnosed based on ICD-10 codes I20–I25 and I60–I64; "not received" refers to participants not receiving lipid-lowering drugs (statins); "received" refers to participants receiving lipid-lowering drugs (statins). Based on the 1H NMR (Bruker IVDr/B.I.LISA) classification, LDL subclasses are defined by density as follows: LDL-1 (1.019–1.031 kg/L) and LDL-2 (1.031–1.034 kg/L) are classified as large buoyant LDL; LDL-3 through LDL-5 (1.034–1.044 kg/L) are classified as intermediate-density LDL; and LDL-6 (1.044–1.063 kg/L) is classified as small dense LDL (sdLDL). T2DM, type 2 diabetes mellitus; CVD, cardiovascular diseases; VLDL, very-low-density lipoprotein; IDL, intermediate-density lipoprotein; LDL, low-density lipoprotein; HDL, high-density lipoprotein; ApoA1, apolipoprotein A1; ApoA2, apolipoprotein A2; ApoB100, apolipoprotein B100.  a Statistically significant difference between "not received" and "received" groups in the T2DM  b Statistically significant difference between "not received" in the T2DM compared to the control group  c Statistically significant difference between all of the CVD group compared to the control group.  *p* value in bold indicate significant differences (*p* < 0.05), analyzed by Mann-Whitney U test. | | | | | | | | | | | | | | | | |

| **Supplementary Table 6** Beta coefficient between biochemical indexes and lipids and lipoproteins | | | | | | |
| --- | --- | --- | --- | --- | --- | --- |
| **variables** | **BMI** | **FBG** | **HbA1c** | **Insulin** | **HOMA-IR** | **Lipid-lowering drugs** |
| **β (95% CI)** | **β (95% CI)** | **β (95% CI)** | **β (95% CI)** | **β (95% CI)** | **β (95% CI)** |
| Lp(a) | 0.00 (-0.01; 0.01) | 0.00 (0.00; 0.00) | -0.01 (-0.05; 0.03) | 0.00 (0.00; 0.01) | 0.00 (-0.01; 0.01) | -0.09 (-0.29; 0.11) |
| *Lipids and apolipoprotein to mg/dL* | | | | | | |
| Triglyceride | 2.62 (1.02; 4.22) | 0.52(0.31; 0.74) | 14.53 (9.06; 20.00) | 0.33 (-0.14; 0.80) | 1.33 (-0.14; 2.80) | 10.92 (-17.36; 39.20) |
| Cholesterol | -2.05 (-3.30; -0.80) | 0.02 (-0.17; 0.20) | -0.98 (-5.78; 3.82) | -0.23 (-0.60; 0.14) | -0.81 (-1.96; 0.34) | -33.79 (-56.16; -11.42) |
| LDL | -1.42 (-2.44; -0.40) | -0.03 (-0.18; 0.12) | -1.98 (-5.83; 1.87) | -0.07 (-0.36; 0.23) | -0.30 (-1.24; 0.63) | -29.29 (-46.49; -12.10) |
| HDL | -1.03 (-1.38; -0.67) | -0.07 (-0.13; -0.02) | -2.29 (-3.70; -0.89) | -0.19 (-0.30; -0.08) | -0.63 (-0.97; -0.30) | -5.40 (-10.67; -0.14) |
| ApoA1 | -1.61 (-2.28; -0.94) | -0.11 (-0.21; -0.01) | -3.58 (-6.19; -0.97) | -0.31 (-0.51; -0.11) | -1.06 (-1.69; -0.44) | -9.28 (-19.00; 0.43) |
| ApoA2 | -0.19 (-0.32; -0.06) | -0.02 (-0.04; 0.00) | -0.58 (-1.07; -0.09) | -0.04 (-0.08; 0.00) | -0.14 (-0.26; -0.03) | -1.76 (-3.87; 0.35) |
| ApoB100 | -0.29 (-0.99; 0.40) | 0.09 (-0.01; 0.18) | 1.77 (-0.75; 4.29) | 0.00 (-0.20; 0.20) | 0.04 (-0.58; 0.65) | -14.16 (-26.60; -1.72) |
| LDL/ HDL | 0.01 (-0.01; 0.03) | 0.00 (0.00; 0.00) | 0.04 (-0.04; 0.12) | 0.01 (0.00; 0.01) | 0.02 (0.00; 0.04) | -0.40 (-0.76; -0.03) |
| ApoB100/ApoA1 | 0.00 (0.00; 0.01) | 0.00 (0.00; 0.00) | 0.02 (0.01; 0.04) | 0.00 (0.00; 0.00) | 0.00 (0.00; 0.01) | -0.07 (-0.16; 0.03) |
| *Lipoprotein particle number; nmol/L* | | | | | | |
| Total particle number | -5.35 (-17.93; 7.23) | 1.56 (-0.18; 3.31) | 32.21 (-13.59; 78.00) | 0.00 (-3.56; 3.57) | 0.66 (-10.51; 11.83) | -257.49 (-483.74; -31.23) |
| VLDL particle number | 3.39 (1.49; 5.29) | 0.65 (0.39; 0.90) | 19.05 (12.64; 25.45) | 0.34 (-0.22; 0.91) | 1.49 (-0.28; 3.26) | 11.07 (-21.93; 44.06) |
| IDL particle number | 1.32 (0.35; 2.30) | 0.23 (0.09; 0.36) | 6.84 (3.39; 10.29) | 0.22 (-0.06; 0.51) | 0.83 (-0.05; 1.71) | -7.07 (-23.88; 9.74) |
| LDL particle number | -10.29 (-21.67; 1.09) | 0.55 (-1.06; 2.17) | 2.00 (-40.26; 44.26) | -0.24 (-3.51; 3.02) | -0.70 (-10.92; 9.52) | -270.99 (-468.16; -73.81) |
| LDL-1 particle number | -3.26 (-5.18; -1.35) | -0.33 (-0.60; -0.05) | -8.95 (-16.11; -1.78) | -0.33 (-0.89; 0.24) | -1.75 (-3.49; 0.00) | -49.56 (-79.25; -19.87) |
| LDL-2 particle number | -4.67 (-6.80; -2.53) | -0.48 (-0.79; -0.17) | -14.46 (-22.45; -6.46) | -0.37 (-1.02; 0.28) | -1.89 (-3.90; 0.12) | -70.63 (-98.43; -42.84) |
| LDL-3 particle number | -4.06 (-6.31; -1.81) | -0.53 (-0.84; -0.21) | -15.96 (-24.12; -7.80) | -0.16 (-0.83; 0.51) | -1.27 (-3.35; 0.81) | -72.72 (-105.21; -40.24) |
| LDL-4 particle number | -1.29 (-3.69; 1.11) | -0.20 (-0.54; 0.13) | -6.92 (-15.66; 1.82) | 0.28 (-0.40; 0.96) | 0.60 (-1.54; 2.73) | -53.10 (-92.88; -13.32) |
| LDL-5 particle number | 1.61 (-1.40; 4.62) | 0.74 (0.34; 1.14) | 17.30 (6.71; 27.89) | 0.37 (-0.49; 1.23) | 2.12 (-0.55; 4.79) | -20.60 (-73.22; 32.02) |
| LDL-6 particle number | 2.28 (-1.74; 6.30) | 1.41 (0.91; 1.91) | 33.08 (19.66; 46.50) | 0.00 (-1.16; 1.15) | 1.68 (-1.91; 5.28) | -0.82 (-71.19; 69.56) |
| *Triglyceride to cholesterol to free cholesterol to phospholipids to and apolipoprotein distribution to mg/dL* | | | | | | |
| VLDL-triglyceride | 2.33 (1.06; 3.60) | 0.44 (0.27; 0.61) | 12.32 (7.97; 16.67) | 0.27 (-0.11; 0.65) | 1.15 (-0.04; 2.33) | 10.28 (-12.28; 32.84) |
| IDL-triglyceride | 0.43 (0.16; 0.70) | 0.08 (0.05; 0.12) | 2.30 (1.34; 3.25) | 0.06 (-0.02; 0.14) | 0.23 (-0.02; 0.48) | 2.04 (-2.90; 6.98) |
| LDL-triglyceride | 0.09 (-0.07; 0.25) | 0.02 (0.00; 0.05) | 0.65 (0.08; 1.21) | 0.02 (-0.02; 0.06) | 0.08 (-0.06; 0.22) | -1.20 (-3.75; 1.35) |
| HDL-triglyceride | 0.01 (-0.10; 0.11) | 0.01 (-0.01; 0.02) | 0.17 (-0.21; 0.56) | -0.01 (-0.04; 0.02) | -0.03 (-0.13; 0.06) | 0.57 (-0.84; 1.99) |
| VLDL-cholesterol | 0.41 (0.07; 0.74) | 0.10 (0.06; 0.15) | 2.81 (1.67; 3.95) | 0.03 (-0.06; 0.13) | 0.17 (-0.13; 0.47) | 1.56 (-4.28; 7.39) |
| IDL-cholesterol | 0.19 (0.02; 0.35) | 0.04 (0.02; 0.07) | 1.24 (0.66; 1.82) | 0.03 (-0.02; 0.08) | 0.11 (-0.04; 0.26) | -1.33 (-4.35; 1.68) |
| VLDL-free cholesterol | 0.18 (0.05; 0.31) | 0.04 (0.03; 0.06) | 1.22 (0.78; 1.67) | 0.01 (-0.03; 0.05) | 0.07 (-0.05; 0.19) | 0.65 (-1.67; 2.97) |
| IDL-free cholesterol | 0.05 (0.00; 0.10) | 0.01 (0.01; 0.02) | 0.33 (0.17; 0.49) | 0.01 (-0.01; 0.02) | 0.03 (-0.01; 0.07) | -0.40 (-1.23; 0.43) |
| LDL-free cholesterol | -0.47 (-0.74; -0.19) | -0.02 (-0.06; 0.02) | -0.81 (-1.85; 0.22) | -0.04 (-0.12; 0.04) | -0.15 (-0.40; 0.10) | -8.13 (-12.69; -3.57) |
| HDL-free cholesterol | -0.35 (-0.45; -0.25) | -0.02 (-0.04; -0.01) | -0.76 (-1.17; -0.35) | -0.06 (-0.10; -0.03) | -0.22 (-0.31; -0.12) | -1.79 (-3.28; -0.31) |
| VLDL-phospholipids | 0.50 (0.20; 0.79) | 0.09 (0.06; 0.13) | 2.73 (1.73; 3.73) | 0.06 (-0.03; 0.14) | 0.24 (-0.04; 0.51) | 2.18 (-2.94; 7.31) |
| IDL-phospholipids | 0.07 (-0.03; 0.17) | 0.03 (0.01; 0.04) | 0.72 (0.37; 1.06) | 0.01 (-0.02; 0.04) | 0.04 (-0.04; 0.13) | -0.53 (-2.34; 1.28) |
| LDL-phospholipids | -0.70 (-1.19; -0.21) | -0.03 (-0.10; 0.04) | -1.24 (-3.09; 0.61) | -0.03 (-0.17; 0.11) | -0.16 (-0.60; 0.29) | -14.05 (-22.25; -5.85) |
| HDL-phospholipids | -1.24 (-1.74; -0.74) | -0.12 (-0.19; -0.05) | -3.57 (-5.47; -1.67) | -0.24 (-0.39; -0.09) | -0.83 (-1.30; -0.37) | -5.32 (-12.42; 1.77) |
| HDL- ApoA1 | -1.81 (-2.53; -1.09) | -0.14 (-0.25; -0.03) | -4.22 (-7.03; -1.40) | -0.35 (-0.57; -0.13) | -1.21(-1.88; -0.53) | -10.12 (-20.54; 0.30) |
| HDL- ApoA2 | -0.16 (-0.29; -0.03) | -0.01 (-0.03; 0.00) | -0.43 (-0.91; 0.05) | -0.03 (-0.07; 0.00) | -0.12 (-0.24; -0.01) | -1.54 (-3.65; 0.57) |
| VLDL- ApoB100 | 0.19 (0.08; 0.29) | 0.04 (0.02; 0.05) | 1.05 (0.70; 1.40) | 0.02 (-0.01; 0.05) | 0.08 (-0.02; 0.18) | 0.61 (-1.21; 2.42) |
| IDL- ApoB100 | 0.07 (0.02; 0.13) | 0.01 (0.01; 0.02) | 0.38 (0.19; 0.57) | 0.01 (0.00; 0.03) | 0.05 (0.00; 0.09) | -0.39 (-1.31; 0.54) |
| LDL- ApoB100 | -0.57 (-1.19; 0.06) | 0.03 (-0.06; 0.12) | 0.11 (-2.21; 2.43) | -0.01 (-0.19; 0.17) | -0.04 (-0.60; 0.52) | -14.90 (-25.75; -4.06) |
| VLDL-1-triglyceride | 1.46 (0.72; 2.20) | 0.27 (0.17; 0.37) | 7.18 (4.64; 9.72) | 0.20 (-0.02; 0.42) | 0.83 (0.15; 1.51) | 7.21 (-5.79; 20.21) |
| VLDL-2-triglyceride | 0.35 (0.10; 0.61) | 0.07 (0.04; 0.11) | 2.04 (1.15; 2.92) | 0.04 (-0.04; 0.11) | 0.15 (-0.08; 0.39) | 1.62 (-2.96; 6.20) |
| VLDL-3-triglyceride | 0.27 (0.07; 0.46) | 0.05 (0.03; 0.08) | 1.60 (0.92; 2.28) | 0.02 (-0.04; 0.08) | 0.09 (-0.09; 0.27) | 1.00 (-2.54; 4.54) |
| VLDL-4-triglyceride | 0.21 (0.10; 0.33) | 0.04 (0.02; 0.05) | 1.18 (0.80; 1.55) | 0.01 (-0.02; 0.05) | 0.08 (-0.03; 0.18) | 0.53 (-1.44; 2.51) |
| VLDL-5-triglyceride | 0.02 (0.00; 0.04) | 0.00 (0.00; 0.01) | 0.17 (0.09; 0.24) | 0.00 (-0.01; 0.00) | 0.00 (-0.02; 0.02) | 0.11 (-0.22; 0.44) |
| VLDL-1-cholesterol | 0.19 (0.05; 0.32) | 0.04 (0.03; 0.06) | 1.12 (0.66; 1.59) | 0.02 (-0.02; 0.06) | 0.10 (-0.02; 0.22) | 1.11 (-1.23; 3.46) |
| VLDL-2-cholesterol | 0.05 (-0.02; 0.11) | 0.02 (0.01; 0.03) | 0.43 (0.20; 0.66) | 0.00 (-0.02; 0.02) | 0.02 (-0.04; 0.07) | 0.23 (-0.94; 1.40) |
| VLDL-3-cholesterol | 0.07 (0.00; 0.14) | 0.02 (0.01; 0.03) | 0.50 (0.27; 0.74) | 0.00 (-0.02; 0.02) | 0.02 (-0.04; 0.08) | 0.23 (-0.97; 1.44) |
| VLDL-4-cholesterol | 0.08 (0.01; 0.16) | 0.02 (0.01; 0.03) | 0.63 (0.37; 0.88) | 0.00 (-0.02; 0.02) | 0.02 (-0.04; 0.09) | 0.14 (-1.18; 1.45) |
| VLDL-5-cholesterol | 0.00 (-0.01; 0.02) | 0.00 (0.00; 0.00) | 0.08 (0.03; 0.13) | 0.00 (-0.01; 0.00) | -0.01 (-0.02; 0.01) | 0.03 (-0.19; 0.25) |
| VLDL-1-free cholesterol | 0.09 (0.04; 0.14) | 0.02 (0.01; 0.03) | 0.47 (0.29; 0.66) | 0.01 (0.00; 0.03) | 0.05 (0.01; 0.10) | 0.36 (-0.56; 1.29) |
| VLDL-2-free cholesterol | 0.03 (0.00; 0.06) | 0.01 (0.00; 0.01) | 0.20 (0.11; 0.30) | 0.00 (-0.01; 0.01) | 0.01 (-0.01; 0.04) | 0.09 (-0.42; 0.60) |
| VLDL-3-free cholesterol | 0.04 (0.01; 0.07) | 0.01 (0.01; 0.01) | 0.27 (0.16; 0.37) | 0.00 (-0.01; 0.01) | 0.01 (-0.01; 0.04) | 0.17 (-0.36; 0.71) |
| VLDL-4-free cholesterol | 0.04 (0.00; 0.07) | 0.01 (0.00; 0.01) | 0.27 (0.17; 0.38) | 0.00 (-0.01; 0.01) | 0.01 (-0.02; 0.04) | -0.04 (-0.60; 0.51) |
| VLDL-5-free cholesterol | 0.01 (0.00; 0.01) | 0.00 (0.00; 0.00) | 0.04 (0.01; 0.07) | 0.00 (0.00; 0.00) | 0.00 (-0.01; 0.01) | 0.02 (-0.13; 0.17) |
| VLDL-1-phospholipids | 0.23 (0.11; 0.35) | 0.04 (0.03; 0.06) | 1.12 (0.68; 1.55) | 0.03 (0.00; 0.07) | 0.14 (0.02; 0.25) | 1.24 (-0.92; 3.40) |
| VLDL-2-phospholipids | 0.09 (0.02; 0.15) | 0.02 (0.01; 0.03) | 0.48 (0.26; 0.70) | 0.01 (-0.01; 0.03) | 0.04 (-0.02; 0.10) | 0.40 (-0.71; 1.51) |
| VLDL-3-phospholipids | 0.10 (0.03; 0.16) | 0.02 (0.01; 0.03) | 0.52 (0.31; 0.74) | 0.01 (-0.01; 0.03) | 0.04 (-0.02; 0.10) | 0.31 (-0.77; 1.40) |
| VLDL-4-phospholipids | 0.09 (0.03; 0.14) | 0.02 (0.01; 0.02) | 0.53 (0.30; 0.72) | 0.01 (-0.01; 0.02) | 0.03 (-0.02; 0.08) | 0.16 (-0.80; 1.13) |
| VLDL-5-phospholipids | 0.01 (-0.01; 0.03) | 0.00 (0.00; 0.00) | 0.11 (0.05; 0.16) | 0.00 (-0.01; 0.00) | 0.00 (-0.02; 0.01) | 0.07 (-0.19; 0.34) |
| LDL-1-triglyceride | 0.03 (-0.02; 0.08) | 0.00 (-0.01; 0.01) | 0.12 (-0.07; 0.30) | 0.01 (-0.01; 0.02) | 0.01 (-0.03; 0.06) | -0.40 (-1.15; 0.35) |
| LDL-2-triglyceride | -0.02 (-0.04; 0.00) | 0.00 (-0.01; 0.00) | -0.11 (-0.19; -0.03) | 0.00 (0.00; 0.01) | 0.00 (-0.02; 0.01) | -0.50 (-0.80; -0.20) |
| LDL-3-triglyceride | -0.02 (-0.04; 0.00) | 0.00 (0.00; 0.00) | -0.03 (-0.10; 0.04) | 0.00 (-0.01; 0.01) | 0.00 (-0.02; 0.02) | -0.38 (-0.68; -0.09) |
| LDL-4-triglyceride | 0.01 (-0.02; 0.04) | 0.00 (0.00; 0.01) | 0.02 (-0.08; 0.13) | 0.01 (0.00; 0.01) | 0.02 (-0.01; 0.04) | -0.20 (-0.66; 0.25) |
| LDL-5-triglyceride | 0.03 (-0.01; 0.07) | 0.01 (0.00; 0.02) | 0.24 (0.11; 0.38) | 0.01 (-0.01; 0.02) | 0.03 (0.00; 0.06) | 0.10 (-0.56; 0.75) |
| LDL-6-triglyceride | 0.05 (0.01; 0.09) | 0.01 (0.01; 0.02) | 0.37 (0.22; 0.51) | 0.00 (-0.01; 0.02) | 0.03 (-0.01; 0.07) | 0.29 (-0.45; 1.02) |
| LDL-1-cholesterol | -0.44 (-0.66; -0.22) | -0.04 (-0.07; -0.01) | -1.17 (-2.00; -0.35) | -0.04 (-0.11; 0.02) | -0.22 (-0.42; -0.01) | -6.12 (-9.54; -2.69) |
| LDL-2-cholesterol | -0.54 (-0.78; -0.31) | -0.05 (-0.09; -0.02) | -1.64 (-2.52; -0.75) | -0.04 (-0.12; 0.03) | -0.22 (-0.44; 0.00) | -7.67 (-10.72; -4.62) |
| LDL-3-cholesterol | -0.47 (-0.70; -0.23) | -0.06 (-0.09; -0.03) | -1.79 (-2.65; -0.93) | -0.02 (-0.09; 0.05) | -0.16 (-0.38; 0.06) | -7.65 (-11.04; -4.26) |
| LDL-4-cholesterol | -0.18 (-0.41; 0.04) | -0.03 (-0.06; 0.00) | -0.86 (-1.67; -0.04) | 0.02 (-0.04; 0.08) | 0.02 (-0.18; 0.22) | -5.34 (-9.06; -1.62) |
| LDL-5-cholesterol | 0.08 (-0.16; 0.32) | 0.05 (0.02; 0.08) | 1.20 (0.35; 2.04) | 0.03 (-0.04; 0.10) | 0.16 (-0.05; 0.37) | -2.12 (-6.30; 2.06) |
| LDL-6-cholesterol | 0.12 (-0.15; 0.39) | 0.09 (0.06; 0.12) | 2.12 (1.21; 3.02) | 0.00 (-0.08; 0.08) | 0.11 (-0.13; 0.35) | -0.51 (-5.26; 4.24) |
| LDL-1-free cholesterol | -0.12 (-0.19; -0.06) | -0.01 (-0.02; 0.00) | -0.27 (-0.51; -0.03) | -0.01 (-0.03; 0.00) | -0.06 (-0.12; -0.01) | -1.77 (-2.76; -0.77) |
| LDL-2-free cholesterol | -0.17 (-0.24; -0.10) | -0.02 (-0.03; -0.01) | -0.47 (-0.73; -0.21) | -0.02 (-0.04; 0.00) | -0.08 (-0.15; -0.02) | -2.19 (-3.10; -1.29) |
| LDL-3-free cholesterol | -0.15 (-0.22; -0.09) | -0.02 (-0.03; -0.01) | -0.49 (-0.73; -0.25) | -0.01 (-0.03; 0.00) | -0.07 (-0.13; -0.01) | -1.98 (-2.91; -1.04) |
| LDL-4-free cholesterol | -0.07 (-0.12; -0.01) | -0.01 (-0.01; 0.00) | -0.22 (-0.42; -0.02) | 0.00 (-0.02; 0.01) | -0.01 (-0.06; 0.04) | -1.39 (-2.30; -0.48) |
| LDL-5-free cholesterol | 0.00 (-0.05; 0.06) | 0.01 (0.00; 0.02) | 0.25 (0.05; 0.44) | 0.00 (-0.01; 0.02) | 0.02 (-0.02; 0.07) | -0.58 (-1.57; 0.40) |
| LDL-6-free cholesterol | 0.01 (-0.05; 0.07) | 0.02 (0.01; 0.03) | 0.46 (0.26; 0.67) | 0.00 (-0.02; 0.01) | 0.02 (-0.04; 0.07) | -0.17 (-1.23; 0.88) |
| LDL-1-phospholipids | -0.20 -0.31; -0.10) | -0.0 (-0.04; -0.01) | -0.58 (-0.98; -0.18) | -0.02 (-0.05; 0.01) | -0.10 (-0.20; 0.00) | -2.87 (-4.54; -1.20) |
| LDL-2-phospholipids | -0.28 (-0.40; -0.16) | -0.03 (-0.05; -0.01) | -0.87 (-1.32; -0.43) | -0.02 (-0.06; 0.01) | -0.12 (-0.23; 0.00) | -3.84 (-5.38; -2.31) |
| LDL-3-phospholipids | -0.23 (-0.35; -0.12) | -0.03 (-0.05; -0.01) | -0.93 (-1.35; -0.51) | -0.01 (-0.05; 0.02) | -0.08 (-0.19; 0.03) | -3.77 (-5.43; -2.10) |
| LDL-4-phospholipids | -0.08 (-0.20; 0.03) | -0.01 (-0.03; 0.00) | -0.44 (-0.85; -0.04) | 0.01 (-0.02; 0.04) | 0.01 (-0.09; 0.11) | -2.59 (-4.44; -0.73) |
| LDL-5-phospholipids | 0.04 (-0.07; 0.16) | 0.03 (0.01; 0.04) | 0.58 (0.16; 1.00) | 0.02 (-0.02; 0.05) | 0.08 (-0.02; 0.19) | -0.98 (-3.04; 1.08) |
| LDL-6-phospholipids | 0.05 (-0.08; 0.18) | 0.04 (0.03; 0.06) | 0.98 (0.55; 1.41) | 0.00 (-0.04; 0.03) | 0.05 (-0.07; 0.16) | -0.17 (-2.42; 2.07) |
| LDL-1-ApoB100 | -0.18 (-0.28; -0.07) | -0.02 (-0.03; 0.00) | -0.49 (-0.89; -0.10) | -0.02 (-0.05; 0.01) | -0.10 (-0.19; 0.00) | -2.73 (-4.36; -1.09) |
| LDL-2-ApoB100 | -0.26 (-0.37; -0.14) | -0.03 (-0.04; -0.01) | -0.80 (-1.23; -0.36) | -0.02 (-0.06; 0.02) | -0.10 (-0.21; 0.01) | -3.89 (5.41; -2.36) |
| LDL-3-ApoB100 | -0.22 (-0.35; -0.10) | -0.03 (-0.05; -0.01) | -0.88 (-1.33; -0.43) | -0.01 (-0.05; 0.03) | -0.07 (-0.18; 0.04) | -4.00 (-5.79; -2.21) |
| LDL-4-ApoB100 | -0.07 (-0.20; 0.06) | -0.01 (-0.03; 0.01) | -0.38 (-0.86; 0.10) | 0.02 (-0.02; 0.05) | 0.03 (-0.08; 0.15) | -2.92 (-5.11; -0.73) |
| LDL-5-ApoB100 | 0.09 (-0.08; 0.25) | 0.04 (0.02; 0.06) | 0.95 (0.37; 1.53) | 0.02 (-0.03; 0.07) | 0.12 (-0.03; 0.26) | -1.13 (-4.03; 1.76) |
| LDL-6-ApoB100 | 0.13 (-0.10; 0.35) | 0.08 (0.05; 0.10) | 1.82 (1.08; 2.56) | 0.00 (-0.06; 0.06) | 0.09 (-0.11; 0.29) | -0.04 (-3.91; 3.83) |
| HDL-1-triglyceride | -0.05 (-0.09; 0.00) | 0.00 (-0.01; 0.01) | -0.03 (-0.21; 0.15) | -0.01 (-0.03; 0.00) | -0.04 (-0.08; 0.00) | 0.04 (-0.55; 0.62) |
| HDL-2-triglyceride | 0.00 (-0.02; 0.02) | 0.00 (0.00; 0.00) | 0.02 (-0.06; 0.10) | 0.00 (-0.01; 0.00) | -0.01 (-0.03; 0.01) | 0.07 (-0.21; 0.36) |
| HDL-3-triglyceride | 0.02 (-0.01; 0.04) | 0.00 (0.00; 0.00) | 0.04 (-0.05; 0.13) | 0.00 (-0.01; 0.01) | 0.00 (-0.02; 0.02) | 0.14 (-0.21; 0.49) |
| HDL-4-triglyceride | 0.04 (0.01; 0.07) | 0.00 (0.00; 0.01) | 0.14 (0.03; 0.25) | 0.01 (0.00; 0.02) | 0.02 (-0.01; 0.05) | 0.30 (-0.16; 0.77) |
| HDL-1-cholesterol | -0.58 (-0.78; -0.37) | -0.03 (-0.06; 0.00) | -1.09 (-1.92; -0.27) | -0.11 (-0.17; -0.04) | -0.33 (-0.53; -0.13) | -2.68 (-5.43; 0.06) |
| HDL-2-cholesterol | -0.20 (-0.27; -0.12) | -0.01 (-0.03; 0.00) | -0.47 (-0.76; -0.18) | -0.04 (-0.06; -0.02) | -0.13 (-0.20; -0.06) | -0.93 (-1.98; 0.13) |
| HDL-3-cholesterol | -0.14 (-0.21; -0.07) | -0.02 (-0.03; -0.01) | -0.50 (-0.75; -0.25) | -0.03 (-0.05; -0.01) | -0.10 (-0.16; -0.03) | -0.82 (-1.87; 0.22) |
| HDL-4-cholesterol | -0.08 (-0.19; 0.04) | -0.01 (-0.03; 0.01) | -0.24 (-0.66; 0.19) | -0.01 (-0.04; 0.02) | -0.05 (-0.15; 0.05) | -0.99 (-2.87; 0.88) |
| HDL-1-free cholesterol | -0.18 (-0.23; -0.13) | -0.01 (-0.02; 0.00) | -0.40 (-0.60; -0.19) | -0.03 (-0.05; -0.02) | -0.10 (-0.15; -0.05) | -0.95 (-1.65; -0.26) |
| HDL-2-free cholesterol | -0.05 (-0.07; -0.03) | 0.00 (-0.01; 0.00) | -0.15 (-0.21; -0.08) | -0.01 (-0.02; -0.01) | -0.03 (-0.05; -0.02) | -0.28 (-0.54; -0.02) |
| HDL-3-free cholesterol | -0.04 (-0.06; -0.02) | 0.00 (-0.01; 0.00) | -0.13 (-0.20; -0.07) | -0.01 (-0.01; 0.00) | -0.03 (-0.04; -0.01) | -0.36 (-0.62; -0.09) |
| HDL-4-free cholesterol | -0.02 (-0.05; 0.00) | 0.00 (-0.01; 0.00) | -0.07 (-0.16; 0.03) | -0.01 (-0.01; 0.00) | -0.02 (-0.05; 0.00) | -0.30 (-0.71; 0.11) |
| HDL-1-phospholipids | -0.71 (-0.97; -0.45) | -0.05 (-0.09; -0.01) | -1.55 (-2.58; -0.53) | -0.14 (-0.22; -0.06) | -0.43 (-0.68; -0.18) | -2.80 (-6.16; 0.55) |
| HDL-2-phospholipids | -0.26 (-0.38; -0.14) | -0.02 (-0.04; -0.01) | -0.74 (-1.19; -0.28) | -0.05 (-0.09; -0.02) | -0.18 (-0.29; -0.07) | -1.05 (-2.71; 0.61) |
| HDL-3-phospholipids | -0.16 (-0.28; -0.04) | -0.03 (-0.04; -0.01) | -0.75 (-1.17; -0.32) | -0.03 (-0.07; 0.00) | -0.13 (-0.23; -0.02) | -0.87 (-2.66; 0.92) |
| HDL-4-phospholipids | -0.08 (-0.21; 0.06) | -0.02 (-0.04; 0.00) | -0.49 (-0.97; -0.01) | -0.01 (-0.04; 0.03) | -0.06 (-0.18; 0.05) | -0.82 (-2.94; 1.31) |
| HDL-1-ApoA1 | -1.08 (-1.45; -0.71) | -0.06 (-0.11; 0.00) | -2.04 (-3.54; -0.54) | -0.21 (-0.32; -0.10) | -0.65 (-1.00; -0.29) | -4.16 (-8.91; 0.59) |
| HDL-2-ApoA1 | -0.28 (-0.42; -0.13) | -0.03 (-0.05; -0.01) | -0.94 (-1.48; -0.41) | -0.05 (-0.09; -0.01) | -0.18 (-0.31; -0.04) | -1.09 (-3.08; 0.89) |
| HDL-3-ApoA1 | -0.27 (-0.45; -0.09) | -0.04 (-0.07; -0.02) | -1.12 (-1.77; -0.47) | -0.05 (-0.11; 0.00) | -0.21 (-0.37; -0.05) | -1.58 (-4.20; 1.05) |
| HDL-4-ApoA1 | -0.15 (-0.50; 0.19) | -0.02 (-0.07; 0.03) | -0.32 (-1.60; 0.95) | -0.02 (-0.12; 0.08) | -0.13 (-0.44; 0.17) | -2.57 (-8.21; 3.07) |
| HDL-1-ApoA2 | -0.09 (-0.13; -0.06) | -0.01 (-0.01; 0.00) | -0.23 (-0.37; -0.08) | -0.02 (-0.03; -0.01) | -0.06 (-0.09; -0.02) | -0.42 (-0.91; 0.07) |
| HDL-2-ApoA2 | -0.04 (-0.07; -0.01) | -0.01 (-0.01; 0.00) | -0.17 (-0.28; -0.06) | -0.01 (-0.02; 0.00) | -0.03 (-0.06; 0.00) | -0.35 (-0.79; 0.09) |
| HDL-3-ApoA2 | -0.03 (-0.08; 0.01) | -0.01 (-0.01; 0.00) | -0.19 (-0.34; -0.04) | -0.01 (-0.02; 0.01) | -0.03 (-0.06; 0.01) | -0.38 (-1.01; 0.25) |
| HDL-4-ApoA2 | 0.02 (-0.09; 0.12) | 0.00 (-0.01; 0.01) | 0.05 (-0.34; 0.43) | 0.01 (-0.02; 0.04) | 0.00 (-0.09; 0.09) | -0.53 (-2.17; 1.11) |
| Data are expressed as estimate (95% confidence interval (CI)). Based on the 1H NMR (Bruker IVDr/B.I.LISA) classification, LDL subclasses are defined by density as follows: LDL-1 (1.019–1.031 kg/L) and LDL-2 (1.031–1.034 kg/L) are classified as large buoyant LDL; LDL-3 through LDL-5 (1.034–1.044 kg/L) are classified as intermediate-density LDL; and LDL-6 (1.044–1.063 kg/L) is classified as small dense LDL (sdLDL). BMI, body mass index; FBG, fasting blood glucose; HbA1c, hemoglobin A1C; HOMA-IR, homeostatic model assessment for insulin resistance; Lp(a), lipoprotein (a); VLDL, very-low-density lipoprotein; IDL, intermediate-density lipoprotein; LDL, low-density lipoprotein; HDL, high-density lipoprotein; ApoA1, apolipoprotein A1; ApoA2, apolipoprotein A2; ApoB100, apolipoprotein B100. | | | | | | |

| **Supplementary Table 7** Sub study on the concentration and particle size of lipoproteins between low-moderate and high- intensity of lipid-lowering drugs (statin) in both the T2DM and CVD group | | | | | | | | | | | |
| --- | --- | --- | --- | --- | --- | --- | --- | --- | --- | --- | --- |
| **variable** | | **T2DM** | | | | ***p valuea*** | **CVD** | | | | ***p valueb*** |
| **Low and moderate intensity** | | **High**  **intensity** | | **Low and moderate intensity** | | **High**  **intensity** | |
| **mean** | **± SD** | **mean** | **± SD** | **mean** | **± SD** | **mean** | **± SD** |
| Lp(a) | | 61.80 | ± 92.97 | 32.64 | ± 51.74 | 0.386 | 20.53 | ± 4.27 | 53.44 | ± 43.07 | 0.226 |
| *Lipids and apolipoprotein to mg/dL* | | | | | | | | | | | |
|  | Triglyceride | 128.7 | ± 60.35 | 159.9 | ± 75.07 | 0.233 | 114.7 | ± 36.75 | 120.4 | ± 54.34 | 0.870 |
|  | Cholesterol | 175.9 | ± 41.75 | 192.7 | ± 61.84 | 0.384 | 179.8 | ± 43.44 | 170.3 | ± 44.96 | 0.752 |
|  | LDL | 98.4 | ± 33.16 | 106.2 | ± 44.76 | 0.594 | 99.8 | ± 30.59 | 93.1 | ± 29.88 | 0.742 |
|  | HDL | 52.6 | ± 8.90 | 49.4 | ± 5.74 | 0.324 | 54.8 | ± 15.07 | 47.5 | ± 9.69 | 0.326 |
|  | ApoA1 | 144.3 | ± 18.17 | 140.4 | ± 12.85 | 0.565 | 148.4 | ± 25.25 | 136.2 | ± 18.72 | 0.373 |
|  | ApoA2 | 31.2 | ± 4.05 | 30.1 | ± 2.72 | 0.471 | 31.4 | ± 7.44 | 28.6 | ± 3.40 | 0.350 |
|  | ApoB100 | 80.4 | ± 22.46 | 93.6 | ± 35.19 | 0.223 | 81.5 | ± 23.96 | 79.5 | ± 22.49 | 0.897 |
|  | LDL/ HDL | 1.9 | ± 0.64 | 2.1 | ± 0.88 | 0.385 | 1.9 | ± 0.74 | 2.0 | ± 0.66 | 0.851 |
|  | ApoB100/ApoA1 | 0.6 | ± 0.16 | 0.7 | ± 0.23 | 0.173 | 0.6 | ± 0.15 | 0.6 | ± 0.16 | 0.742 |
| *Lipoprotein particle to nmol/L* | | | | | | | | | | | |
|  | Total particle number | 1462.7 | ± 408.42 | 1701.1 | ± 639.89 | 0.223 | 1481.2 | ± 435.59 | 1445.1 | ± 408.87 | 0.897 |
|  | VLDL particle number | 145.3 | ± 60.60 | 195.3 | ± 95.92 | 0.091 | 131.5 | ± 30.75 | 149.2 | ± 64.77 | 0.663 |
|  | IDL particle number | 67.7 | ± 29.41 | 91.4 | ± 34.46 | 0.061 | 81.6 | ± 44.01 | 78.1 | ± 36.59 | 0.893 |
|  | LDL particle number | 1165.8 | ± 360.27 | 1317.8 | ± 552.31 | 0.370 | 1174.3 | ± 335.24 | 1140.6 | ± 327.89 | 0.879 |
|  | LDL-1 particle number | 157.3 | ± 51.93 | 172.5 | ± 64.54 | 0.495 | 198.2 | ± 58.07 | 171.2 | ± 53.93 | 0.468 |
|  | LDL-2 particle number | 116.6 | ± 53.51 | 113.4 | ± 49.55 | 0.881 | 119.5 | ± 14.12 | 117.7 | ± 42.64 | 0.946 |
|  | LDL-3 particle number | 152.0 | ± 69.43 | 136.8 | ± 67.64 | 0.582 | 171.0 | ± 30.34 | 144.4 | ± 48.54 | 0.396 |
|  | LDL-4 particle number | 205.3 | ± 75.03 | 202.1 | ± 93.94 | 0.921 | 217.5 | ± 98.86 | 198.7 | ± 50.70 | 0.657 |
|  | LDL-5 particle number | 235.1 | ± 85.04 | 285.9 | ± 129.76 | 0.206 | 208.4 | ± 119.53 | 221.2 | ± 91.86 | 0.846 |
|  | LDL-6 particle number | 327.1 | ± 108.10 | 429.3 | ± 212.79 | 0.085 | 283.4 | ± 85.25 | 313.1 | ± 130.56 | 0.722 |
| *% Ratio of LDL subclasses/LDL particle* | | | | | | | | | | | |
|  | LDL-1/ LDL particle number | 13.6 | ± 3.1 | 14.3 | ± 5.6 | 0.694 | 17.28 | ± 4.63 | 15.13 | ± 3.17 | 0.368 |
|  | LDL-2/ LDL particle number | 9.9 | ± 3.2 | 8.7 | ± 1.5 | 0.273 | 10.89 | ± 4.15 | 10.36 | ± 3.48 | 0.826 |
|  | LDL-3/ LDL particle number | 12.8 | ± 3.8 | 10.4 | ± 2.6 | 0.092 | 14.90 | ± 2.11 | 12.76 | ± 3.39 | 0.331 |
|  | LDL-4/ LDL particle number | 17.5 | ± 3.4 | 15.7 | ± 4.6 | 0.233 | 18.01 | ± 5.78 | 17.62 | ± 1.89 | 0.848 |
|  | LDL-5/ LDL particle number | 20.2 | ± 5.1 | 21.4 | ± 3.1 | 0.538 | 16.74 | ± 6.75 | 19.20 | ± 4.13 | 0.444 |
|  | LDL-6/ LDL particle number | 28.5 | ± 7.2 | 32.1 | ± 4.9 | 0.184 | 24.15 | ± 1.73 | 27.29 | ± 6.64 | 0.447 |
| *Triglyceride to cholesterol to free cholesterol to phospholipids to and apolipoprotein distribution to mg/dL* | | | | | | | | | | | |
|  | VLDL-triglyceride | 93.6 | ± 48.81 | 116.7 | ± 58.90 | 0.270 | 76.6 | ± 31.75 | 80.0 | ± 39.64 | 0.896 |
|  | IDL-triglyceride | 13.1 | ± 11.56 | 17.3 | ± 11.89 | 0.374 | 10.0 | ± 6.65 | 10.2 | ± 8.61 | 0.961 |
|  | LDL-triglyceride | 18.0 | ± 4.24 | 21.1 | ± 5.96 | 0.113 | 20.0 | ± 5.99 | 20.0 | ± 4.76 | 0.983 |
|  | HDL-triglyceride | 11.2 | ± 2.66 | 11.6 | ± 2.66 | 0.676 | 11.8 | ± 0.24 | 11.9 | ± 3.05 | 0.926 |
|  | VLDL-cholesterol | 18.5 | ± 10.28 | 26.7 | ± 17.03 | 0.111 | 15.3 | ± 4.63 | 19.9 | ± 12.15 | 0.542 |
|  | IDL-cholesterol | 10.5 | ± 5.57 | 14.7 | ± 7.25 | 0.094 | 11.8 | ± 6.88 | 11.6 | ± 6.56 | 0.948 |
|  | VLDL-free cholesterol | 10.0 | ± 4.26 | 13.2 | ± 7.04 | 0.126 | 8.6 | ± 2.31 | 9.8 | ± 4.52 | 0.677 |
|  | IDL-free cholesterol | 2.7 | ± 1.47 | 3.9 | ± 2.04 | 0.070 | 3.1 | ± 1.81 | 3.0 | ± 1.84 | 0.974 |
|  | LDL-free cholesterol | 30.3 | ± 9.41 | 31.8 | ± 11.29 | 0.694 | 32.3 | ± 7.39 | 29.1 | ± 7.82 | 0.543 |
|  | HDL-free cholesterol | 12.5 | ± 2.77 | 11.6 | ± 1.75 | 0.357 | 14.0 | ± 2.26 | 12.5 | ± 3.28 | 0.476 |
|  | VLDL-phospholipids | 22.8 | ± 10.64 | 28.4 | ± 14.04 | 0.229 | 18.9 | ± 5.26 | 21.4 | ± 9.01 | 0.651 |
|  | IDL-phospholipids | 5.8 | ± 3.51 | 7.9 | ± 5.19 | 0.200 | 5.0 | ± 3.11 | 5.0 | ± 3.44 | 0.990 |
|  | LDL-phospholipids | 55.7 | ± 15.82 | 59.1 | ± 21.44 | 0.625 | 57.6 | ± 14.99 | 54.2 | ± 14.16 | 0.722 |
|  | HDL-phospholipids | 70.2 | ± 11.51 | 64.7 | ± 10.17 | 0.222 | 73.4 | ± 23.03 | 68.1 | ± 13.07 | 0.612 |
|  | HDL- ApoA1 | 145.8 | ± 19.08 | 140.7 | ± 13.09 | 0.470 | 149.3 | ± 26.35 | 137.3 | ± 20.20 | 0.415 |
|  | HDL- ApoA2 | 31.9 | ± 4.14 | 31.1 | ± 2.47 | 0.609 | 32.0 | ± 7.83 | 29.1 | ± 3.30 | 0.351 |
|  | VLDL- ApoB100 | 8.0 | ± 3.33 | 10.7 | ± 5.28 | 0.090 | 7.2 | ± 1.69 | 8.2 | ± 3.56 | 0.663 |
|  | IDL- ApoB100 | 3.7 | ± 1.62 | 5.0 | ± 1.90 | 0.062 | 4.5 | ± 2.42 | 4.3 | ± 2.01 | 0.892 |
|  | LDL- ApoB100 | 64.1 | ± 19.81 | 72.5 | ± 30.38 | 0.370 | 64.6 | ± 18.44 | 62.7 | ± 18.03 | 0.879 |
|  | VLDL-1-triglyceride | 47.4 | ± 28.29 | 58.6 | ± 31.42 | 0.337 | 39.3 | ± 25.35 | 36.1 | ± 22.12 | 0.836 |
|  | VLDL-2-triglyceride | 15.5 | ± 10.14 | 19.5 | ± 12.47 | 0.358 | 11.4 | ± 4.36 | 14.1 | ± 7.54 | 0.578 |
|  | VLDL-3-triglyceride | 12.4 | ± 7.53 | 16.0 | ± 9.55 | 0.270 | 9.6 | ± 2.53 | 12.1 | ± 6.73 | 0.542 |
|  | VLDL-4-triglyceride | 9.4 | ± 4.06 | 12.2 | ± 5.16 | 0.124 | 8.6 | ± 1.07 | 9.6 | ± 4.02 | 0.697 |
|  | VLDL-5-triglyceride | 3.0 | ± 0.72 | 3.4 | ± 0.92 | 0.183 | 3.1 | ± 0.57 | 3.1 | ± 0.50 | 0.970 |
|  | VLDL-1-cholesterol | 7.3 | ± 4.45 | 9.9 | ± 6.56 | 0.207 | 5.8 | ± 3.00 | 6.9 | ± 4.64 | 0.702 |
|  | VLDL-2-cholesterol | 2.8 | ± 2.14 | 4.2 | ± 3.34 | 0.187 | 1.9 | ± 0.60 | 3.1 | ± 2.31 | 0.392 |
|  | VLDL-3-cholesterol | 3.2 | ± 2.07 | 4.8 | ± 3.27 | 0.129 | 2.5 | ± 0.81 | 3.6 | ± 2.71 | 0.485 |
|  | VLDL-4-cholesterol | 3.8 | ± 2.21 | 6.0 | ± 3.44 | **0.046** | 3.8 | ± 0.77 | 4.8 | ± 3.01 | 0.593 |
|  | VLDL-5-cholesterol | 1.1 | ± 0.39 | 1.4 | ± 0.63 | **0.048** | 1.1 | ± 0.38 | 1.2 | ± 0.42 | 0.630 |
|  | VLDL-1-free cholesterol | 2.6 | ± 1.75 | 3.6 | ± 2.64 | 0.226 | 1.8 | ± 1.35 | 2.2 | ± 1.59 | 0.687 |
|  | VLDL-2-free cholesterol | 1.3 | ± 0.93 | 1.9 | ± 1.47 | 0.184 | 0.8 | ± 0.45 | 1.3 | ± 1.01 | 0.424 |
|  | VLDL-3-free cholesterol | 1.5 | ± 0.97 | 2.2 | ± 1.54 | 0.139 | 1.2 | ± 0.45 | 1.6 | ± 1.12 | 0.567 |
|  | VLDL-4-free cholesterol | 1.6 | ± 0.85 | 2.5 | ± 1.55 | **0.035** | 1.7 | ± 0.37 | 2.0 | ± 1.30 | 0.663 |
|  | VLDL-5-free cholesterol | 0.5 | ± 0.30 | 0.7 | ± 0.36 | 0.234 | 0.6 | ± 0.27 | 0.7 | ± 0.30 | 0.647 |
|  | VLDL-1-phospholipids | 7.1 | ± 4.63 | 9.0 | ± 5.37 | 0.348 | 5.7 | ± 3.86 | 5.7 | ± 3.61 | 0.993 |
|  | VLDL-2-phospholipids | 3.7 | ± 2.33 | 4.7 | ± 3.01 | 0.318 | 2.6 | ± 0.98 | 3.5 | ± 1.88 | 0.455 |
|  | VLDL-3-phospholipids | 3.7 | ± 2.12 | 5.0 | ± 2.95 | 0.201 | 2.8 | ± 0.83 | 3.8 | ± 2.15 | 0.450 |
|  | VLDL-4-phospholipids | 4.1 | ± 1.81 | 5.6 | ± 2.48 | 0.068 | 4.0 | ± 0.62 | 4.6 | ± 2.12 | 0.634 |
|  | VLDL-5-phospholipids | 1.7 | ± 0.51 | 2.0 | ± 0.79 | 0.129 | 1.6 | ± 0.22 | 1.9 | ± 0.46 | 0.351 |
|  | LDL-1-triglyceride | 4.6 | ± 1.16 | 5.6 | ± 1.71 | 0.053 | 6.2 | ± 2.21 | 5.5 | ± 1.16 | 0.471 |
|  | LDL-2-triglyceride | 1.6 | ± 0.46 | 1.6 | ± 0.57 | 0.941 | 2.0 | ± 0.57 | 1.9 | ± 0.33 | 0.645 |
|  | LDL-3-triglyceride | 2.0 | ± 0.56 | 2.2 | ± 0.75 | 0.447 | 2.4 | ± 0.71 | 2.3 | ± 0.42 | 0.736 |
|  | LDL-4-triglyceride | 2.5 | ± 0.68 | 2.8 | ± 0.86 | 0.453 | 2.8 | ± 0.88 | 3.0 | ± 0.74 | 0.709 |
|  | LDL-5-triglyceride | 2.6 | ± 1.08 | 3.3 | ± 1.41 | 0.141 | 2.4 | ± 1.01 | 2.9 | ± 1.19 | 0.550 |
|  | LDL-6-triglyceride | 4.1 | ± 1.38 | 4.9 | ± 1.82 | 0.177 | 4.0 | ± 1.17 | 4.0 | ± 1.47 | 0.974 |
|  | LDL-1-cholesterol | 14.9 | ± 6.20 | 16.2 | ± 7.03 | 0.623 | 18.9 | ± 5.93 | 16.0 | ± 6.86 | 0.536 |
|  | LDL-2-cholesterol | 10.8 | ± 5.74 | 9.9 | ± 5.26 | 0.694 | 10.8 | ± 1.58 | 10.3 | ± 5.05 | 0.858 |
|  | LDL-3-cholesterol | 13.7 | ± 7.05 | 11.6 | ± 6.97 | 0.464 | 15.1 | ± 2.64 | 12.4 | ± 5.38 | 0.425 |
|  | LDL-4-cholesterol | 17.8 | ± 7.15 | 16.9 | ± 8.79 | 0.758 | 18.8 | ± 9.00 | 16.7 | ± 5.15 | 0.597 |
|  | LDL-5-cholesterol | 18.4 | ± 6.75 | 22.0 | ± 10.38 | 0.260 | 16.1 | ± 9.83 | 17.0 | ± 7.22 | 0.870 |
|  | LDL-6-cholesterol | 22.3 | ± 7.26 | 28.6 | ± 14.27 | 0.112 | 19.0 | ± 6.62 | 20.3 | ± 8.42 | 0.805 |
|  | LDL-1-free cholesterol | 4.8 | ± 1.84 | 5.3 | ± 2.23 | 0.469 | 5.9 | ± 2.07 | 5.1 | ± 1.82 | 0.501 |
|  | LDL-2-free cholesterol | 4.0 | ± 1.75 | 3.7 | ± 1.34 | 0.738 | 4.2 | ± 0.94 | 3.8 | ± 1.40 | 0.669 |
|  | LDL-3-free cholesterol | 5.1 | ± 2.03 | 4.6 | ± 1.68 | 0.510 | 5.7 | ± 1.05 | 4.6 | ± 1.49 | 0.268 |
|  | LDL-4-free cholesterol | 5.7 | ± 1.84 | 5.5 | ± 2.09 | 0.773 | 6.1 | ± 2.42 | 5.3 | ± 1.37 | 0.441 |
|  | LDL-5-free cholesterol | 5.6 | ± 1.62 | 6.4 | ± 2.50 | 0.306 | 5.3 | ± 2.45 | 5.2 | ± 1.72 | 0.949 |
|  | LDL-6-free cholesterol | 6.1 | ± 1.62 | 7.5 | ± 3.25 | 0.111 | 5.3 | ± 1.57 | 5.5 | ± 1.81 | 0.874 |
|  | LDL-1-phospholipids | 9.1 | ± 2.92 | 9.7 | ± 3.38 | 0.596 | 11.4 | ± 3.55 | 9.9 | ± 3.17 | 0.481 |
|  | LDL-2-phospholipids | 6.2 | ± 2.95 | 5.7 | ± 2.47 | 0.672 | 6.6 | ± 1.07 | 6.1 | ± 2.53 | 0.780 |
|  | LDL-3-phospholipids | 7.8 | ± 3.51 | 6.7 | ± 3.50 | 0.452 | 8.8 | ± 1.27 | 7.4 | ± 2.65 | 0.425 |
|  | LDL-4-phospholipids | 9.9 | ± 3.52 | 9.4 | ± 4.46 | 0.738 | 10.6 | ± 4.52 | 9.5 | ± 2.56 | 0.577 |
|  | LDL-5-phospholipids | 10.0 | ± 3.32 | 11.7 | ± 5.05 | 0.275 | 8.9 | ± 4.82 | 9.5 | ± 3.56 | 0.834 |
|  | LDL-6-phospholipids | 12.3 | ± 3.41 | 15.2 | ± 6.69 | 0.119 | 10.9 | ± 3.50 | 11.4 | ± 4.03 | 0.839 |
|  | LDL-1-ApoB100 | 8.6 | ± 2.86 | 9.5 | ± 3.55 | 0.495 | 10.9 | ± 3.20 | 9.4 | ± 2.97 | 0.468 |
|  | LDL-2-ApoB100 | 6.4 | ± 2.94 | 6.2 | ± 2.72 | 0.881 | 6.6 | ± 0.77 | 6.5 | ± 2.35 | 0.945 |
|  | LDL-3-ApoB100 | 8.4 | ± 3.82 | 7.5 | ± 3.72 | 0.581 | 9.4 | ± 1.67 | 7.9 | ± 2.67 | 0.395 |
|  | LDL-4-ApoB100 | 11.3 | ± 4.13 | 11.1 | ± 5.17 | 0.920 | 12.0 | ± 5.43 | 10.9 | ± 2.79 | 0.656 |
|  | LDL-5-ApoB100 | 12.9 | ± 4.68 | 15.7 | ± 7.14 | 0.206 | 11.5 | ± 6.58 | 12.2 | ± 5.05 | 0.846 |
|  | LDL-6-ApoB100 | 18.0 | ± 5.95 | 23.6 | ± 11.70 | 0.085 | 15.6 | ± 4.69 | 17.2 | ± 7.18 | 0.722 |
|  | HDL-1-triglyceride | 3.3 | ± 0.88 | 3.3 | ± 1.24 | 0.987 | 3.7 | ± 0.88 | 3.6 | ± 1.35 | 0.881 |
|  | HDL-2-triglyceride | 1.8 | ± 0.51 | 1.8 | ± 0.53 | 0.887 | 1.9 | ± 0.09 | 2.0 | ± 0.56 | 0.653 |
|  | HDL-3-triglyceride | 2.3 | ± 0.73 | 2.4 | ± 0.56 | 0.820 | 2.2 | ± 0.25 | 2.5 | ± 0.59 | 0.435 |
|  | HDL-4-triglyceride | 3.9 | ± 0.93 | 4.1 | ± 0.85 | 0.446 | 3.9 | ± 0.86 | 4.0 | ± 0.87 | 0.905 |
|  | HDL-1-cholesterol | 13.4 | ± 3.92 | 11.8 | ± 4.26 | 0.338 | 14.6 | ± 8.16 | 12.2 | ± 5.52 | 0.573 |
|  | HDL-2-cholesterol | 7.3 | ± 1.59 | 6.5 | ± 1.13 | 0.189 | 7.5 | ± 2.90 | 6.7 | ± 1.97 | 0.624 |
|  | HDL-3-cholesterol | 9.6 | ± 1.83 | 8.6 | ± 1.85 | 0.200 | 10.0 | ± 3.36 | 9.0 | ± 1.59 | 0.512 |
|  | HDL-4-cholesterol | 20.7 | ± 3.69 | 20.6 | ± 3.76 | 0.933 | 21.6 | ± 6.04 | 17.9 | ± 1.99 | 0.101 |
|  | HDL-1-free cholesterol | 3.6 | ± 1.16 | 3.0 | ± 0.91 | 0.192 | 4.1 | ± 1.56 | 3.6 | ± 1.57 | 0.652 |
|  | HDL-2-free cholesterol | 1.8 | ± 0.41 | 1.5 | ± 0.39 | 0.099 | 1.9 | ± 0.69 | 1.8 | ± 0.50 | 0.643 |
|  | HDL-3-free cholesterol | 2.3 | ± 0.48 | 2.1 | ± 0.50 | 0.301 | 2.4 | ± 0.55 | 2.2 | ± 0.49 | 0.554 |
|  | HDL-4-free cholesterol | 4.7 | ± 0.80 | 4.7 | ± 0.94 | 0.963 | 5.0 | ± 1.01 | 4.3 | ± 0.65 | 0.181 |
|  | HDL-1-phospholipids | 15.9 | ± 4.59 | 13.6 | ± 4.62 | 0.205 | 17.3 | ± 11.98 | 16.0 | ± 6.71 | 0.803 |
|  | HDL-2-phospholipids | 11.1 | ± 2.61 | 9.9 | ± 2.23 | 0.203 | 11.3 | ± 5.04 | 11.0 | ± 2.98 | 0.893 |
|  | HDL-3-phospholipids | 15.1 | ± 3.16 | 13.6 | ± 3.47 | 0.278 | 15.2 | ± 5.63 | 14.7 | ± 2.86 | 0.842 |
|  | HDL-4-phospholipids | 27.3 | ± 3.92 | 26.8 | ± 5.22 | 0.768 | 28.3 | ± 5.89 | 25.5 | ± 2.64 | 0.255 |
|  | HDL-1-ApoA1 | 20.7 | ± 6.28 | 18.2 | ± 7.05 | 0.340 | 21.2 | ± 15.57 | 21.2 | ± 9.82 | 01.00 |
|  | HDL-2-ApoA1 | 16.2 | ± 3.33 | 14.4 | ± 3.44 | 0.179 | 17.2 | ± 6.72 | 16.1 | ± 3.49 | 0.692 |
|  | HDL-3-ApoA1 | 26.2 | ± 4.71 | 24.0 | ± 4.96 | 0.255 | 27.1 | ± 7.55 | 25.3 | ± 4.19 | 0.596 |
|  | HDL-4-ApoA1 | 81.0 | ± 11.74 | 81.6 | ± 11.22 | 0.900 | 83.7 | ± 20.02 | 73.5 | ± 7.09 | 0.175 |
|  | HDL-1-ApoA2 | 1.7 | ± 0.72 | 1.4 | ± 0.69 | 0.197 | 1.7 | ± 2.05 | 1.9 | ± 0.99 | 0.820 |
|  | HDL-2-ApoA2 | 2.9 | ± 0.89 | 2.5 | ± 0.66 | 0.258 | 2.7 | ± 1.50 | 2.9 | ± 0.76 | 0.695 |
|  | HDL-3-ApoA2 | 6.0 | ± 1.28 | 5.5 | ± 0.90 | 0.324 | 5.8 | ± 1.90 | 5.9 | ± 1.01 | 0.945 |
|  | HDL-4-ApoA2 | 20.0 | ± 3.18 | 20.3 | ± 3.04 | 0.817 | 20.5 | ± 6.09 | 17.5 | ± 1.65 | 0.158 |
| Data are expressed as mean ± standard deviation. The T2DM group was diagnosed based on ICD-10 codes E11–E14. The CVD group was diagnosed based on ICD-10 codes I20–I25 and I60–I64. Low and moderate intensity was identified atorvastatin 10 – 20 mg, simvastatin 10 – 40 mg, and rosuvastatin 5 – 10 mg. High intensity was identified atorvastatin 40 – 80 mg, simvastatin > 40 mg, and rosuvastatin >20 mg. Based on the 1H NMR (Bruker IVDr/B.I.LISA) classification, LDL subclasses are defined by density as follows: LDL-1 (1.019–1.031 kg/L) and LDL-2 (1.031–1.034 kg/L) are classified as large buoyant LDL; LDL-3 through LDL-5 (1.034–1.044 kg/L) are classified as intermediate-density LDL; and LDL-6 (1.044–1.063 kg/L) is classified as small dense LDL (sdLDL). T2DM, type 2 diabetes mellitus; CVD, cardiovascular diseases; Lp(a), lipoprotein (a); VLDL, very-low-density lipoprotein; IDL, intermediate-density lipoprotein; LDL, low-density lipoprotein; HDL, high-density lipoprotein; ApoA1, apolipoprotein A1; ApoA2, apolipoprotein A2; ApoB100, apolipoprotein B100.  a Statistically significant difference between "low and moderate intensity" and "high intensity" groups in T2DM  b Statistically significant difference between "low and moderate intensity" and "high intensity" groups in CVD  *p* value in bold indicate significant differences (*p* < 0.05), analyzed by Mann-Whitney U test. | | | | | | | | | | | |
